# Supplementary material for: Extended-range predictability of sudden stratospheric warmingevents suggested by mode decomposition
Source: Copernicus journal article supplement (doi:10.5194/wcd-2021-14), 2021-03-11
Supplement: Supplementary file [file wcd-2021-14-AC1-supplement.pdf]

# Response to Reviewers

We would like to thank John Albers and the two anonymous reviewers for careful reading, insightful comments and helpful suggestions for our study. These have been included into the manuscript (see changes indicated in **bold** in the annotated manuscript attached at the end of the reviewer's response). Please find below the detailed responses (in blue) to the reviewers' comments and suggestions. All line indications refer to the new (annotated) version of the manuscript.

The main changes to the manuscript are listed here:

1. We changed the title of the manuscript to "Emergence of representative signals for sudden stratospheric warmings beyond current predictable lead times".
2. We have reframed the implications of our study. We do not aim to improve the predictability of SSWs, and thus we keep the word "predictability" only for literature review. However, the increasing positive values of the tendency of the first PC time series at lead time of 3-4 weeks before the majority of SSWs suggest that the intrinsic predictability of SSWs may be longer than the current two-week predictability shown in the forecasting models. Our results can be viewed as a promising step towards improving the predictability of SSWs in the future by using more advanced statistical methods or in operational forecasting systems.

## Response to John Albers:

This is an interesting paper that does a nice job investigating the relative role of linear and nonlinear processes for driving stratospheric variability, with important implications for subseasonal predictability. In particular, I think it is interesting that the results suggest that linear processes likely dominate downward propagating stratospheric anomalies until the final week or so prior to an SSW, at which point nonlinear processes seem to become important. To be clear, my comments below are not really criticisms of your results, rather I am just trying to mention a few issues that I think would be useful to keep in mind when interpreting what your results imply both in terms of physical process understanding and subseasonal predictability. (Note, all references that I cite are listed at the bottom of this review)

Thank you for your detailed comments and explanations. Below are point-by-point responses, and we also add some discussion in the revised manuscript in response to your comments.

To begin, I should point out that I think that the overall methodology of employing EOFs as a filter is, for the most part, totally fine. Indeed, in many respects, an 'EOF-filter' is a better

filter technique than a spectral filter because it implicitly takes into account both spatial and temporal information. That said, I think that a little bit of caution needs to be used when interpreting what a single EOF represents (here I am mostly, though not completely, referring to your ‘SSW-EOF’,  $E_1$ ).

As nicely discussed in Monahan et al. (2009, in particular their Sect. 3), individual EOFs generally do not coincide with the dynamical/physical modes of the dynamical system from which they are derived. One reason for this, is that the atmosphere and ocean (and certainly the coupled atmospheric-oceanic system) contain processes with very different timescales, which results in a ‘nonnormal’ dynamical system. This concept (i.e., ‘nonnormality’) is relatively easy to understand in terms of something like the NAO, where distinct physical processes like ENSO, the MJO, synoptic-eddy feedbacks, and SSWs all project onto the NAO pattern. This means that total NAO variance (as represented by the 1st EOF of Atlantic MSLP or geopotential) is not a single physical/dynamical mode, but rather a convolution of variance that arises due to many individual physical processes/dynamical processes. That is, any given NAO anomaly is a result of constructive/destructive interference between the different types of variability (i.e., ENSO, MJO, etc.).

Thank you for your insight. We agree that the EOF modes cannot be interpreted by default as physical modes, as e.g. also discussed in Dommenges and Latif (2002), however they are often able to capture structures and dynamics that are intrinsic to the studied phenomena. In our case, the pattern captured by  $E_1$  indicates that PV anomalies are centered at the polar cap. Because  $E_1$  is derived using *only* days around the SSWs,  $E_1$  is targeted towards SSWs by design and the variance explained by  $E_1$  for the days around SSWs is around 28%, which is typically large compared to what can be seen in many climate studies looking at the first EOFs, i.e., often around 10-15%. Here the physical process (dynamics) represented by the variation of  $E_1$  is clear, i.e., it represents the changes in the strength of the polar vortex, and it is strongly correlated with polar cap temperature. Since the weakening of the vortex is the dominant behavior of the polar vortex during SSWs, we believe that  $E_1$  can be used to represent the weakening of the polar vortex even before the occurrence of SSWs, which is supported by the fact that the largest values, i.e., extremes, in the first PC (indicated by red vertical lines in Fig. 2) correspond to SSW events. We have added references and the discussion in Lines 149-152.

Now, thinking in terms of nonnormality has important implications for your results, because (1) it is important for interpreting what physical processes may give rise to your  $E_1$  EOF, and (2) it will dictate what portion of the  $E_1$  EOF variance might be predictable at various forecast leads. To help explain what I mean by this, below I use one possible scenario as an example (the PJO/NAM). To be clear, I do not know to what extent this scenario is applicable to your results (though I would guess it is), but the scenario itself is perhaps less important than thinking about what nonnormality means in terms of your  $E_1$  EOF and the predictability of the variance that this EOF represents.

The potential scenario that I consider here is that your  $E_1$  EOF represents a broader class of

stratospheric variability that regularly occurs and is occasionally punctuated by an SSW event. This is an idea envisioned by several previous authors (e.g., Kodera et al. 2000 and Kuroda and Kodera 2004) where it is postulated that the polar night jet oscillation (PJO) can be considered to be a general class of downward propagating stratospheric anomalies, that may occasionally be punctuated by a particularly strong PJO-like event in the form of a SSW. Because the PJO is typically identified via EOFs, it therefore likely arises from the nonnormal dynamics of ENSO, the MJO, the QBO, internal variability etc. Obviously some of these processes are more predictable at subseasonal leads than others. The SSW on the other hand, may typically (though not always) be due to internal nonlinear stratospheric dynamics (e.g., Sjoberg and Birner 2014, Birner and Albers 2017, White et al. 2019, de la Camara 2019, Nakamura et al. 2020), which are unlikely to be predictable beyond 1-2 weeks (i.e., variability governed by the deterministic limit of predictability).

So, what does this mean in terms of your results and subseasonal predictability? One possibility is that the portion of  $E_1$  that you find behaves linearly is part of a broader class of PJO or NAM like variability that is not necessarily indicative of a future SSW, but may, under certain circumstances, be predictable on subseasonal timescales as you have suggested. On the other hand, the nonlinear portion of  $E_1$  may necessarily be related to SSWs only, and may never be predictable beyond synoptic forecast leads (1-2 weeks). Complicating matters further, is the open question of whether PJO/NAM events without a SSW are strong enough to generate predictable anomalies in the troposphere.

We thank the reviewer for the detailed example and explanation. We agree that the linear component of the PV advection that we found for the lead times of around 3-4 weeks may not be specific to and uniquely representative of SSWs. The same is true for the increasing wave activity at lead times of around 3-4 weeks, which does not guarantee a future SSW either. However, both the linear component of the PV advection and the convergence of wave activity flux lead to a weakening of the polar vortex. When we look at the distribution of  $\frac{dA_1}{dt}$  amongst all 25 SSW events in ERA-interim as shown in the figure below (Figure R1), we see that more than 60% of SSWs have positive values of  $\frac{dA_1}{dt}$  at lead times of 20 days and the median of the distribution is consistently positive from 20 days onwards before the onset of the events. We agree with the reviewer's comments that this signal could be representative of a PJO event. However, it would be difficult to distinguish these signals, as in reanalysis, almost all PJO events are associated with a SSW event, while the reverse is not true. Hence, we think that while the detected signals may also pick up features of PJO events, they are certainly representative of SSW events. Furthermore, the fact that a large number of SSWs display a strong and persistent linear signal indicates the importance of the linear term in preconditioning/modulating the onset of SSWs. Even though the linear component may not be unique to SSWs, we found that large positive values of  $\frac{dA_1}{dt}$  (larger than one standard deviation of  $\frac{dA_1}{dt}$  during winter) correspond to either an SSW event or a strong polar vortex deceleration event (a deceleration of the zonal-mean zonal wind at 10 hPa and 60°N of more than 16.4 m/s in 10 days, which corresponds to the 60th percentile in terms of the strength of all wind deceleration events).  $\frac{dA_1}{dt}$  and its

linear contributor for SSWs events tend to be stronger and more persistent than for the strong deceleration events. Figure R2 shows  $\frac{dA_1}{dt}$  of the composite of the strong deceleration events (red) compared to that of the composite of SSW events (blue). Note that SSW events are a subset of the strong deceleration events and thus we exclude the SSW events from the strong deceleration events in the plot, such that the two sets of events are disjoint to avoid any overlap and ambiguity. The signals shown at lead times of around 20 days appear almost exclusively for SSWs. We added a discussion on this topic in Lines 556-566.

Concerning the nonlinear contributor of  $\frac{dA_1}{dt}$ , we found that it is only important for wave-2 SSW events and has almost no contribution for wave-1 SSWs. Therefore, we will use the nonlinear signals at lead times of 10 days to one week to infer the type of event.

Concerning the downward influence of the stratospheric anomalies in the troposphere, we did not look into whether PJO/NAM events without the reversal of the wind – note that there are very few of these events – can still have an influence on tropospheric weather and we actually did not discuss the downward impact of SSWs in the study. We think this is a very interesting and important question to investigate but it is beyond the scope of the current study. From another perspective, if the PJO/NAM events have a similar downward impact, then the signals found here could also be useful to capture these events.

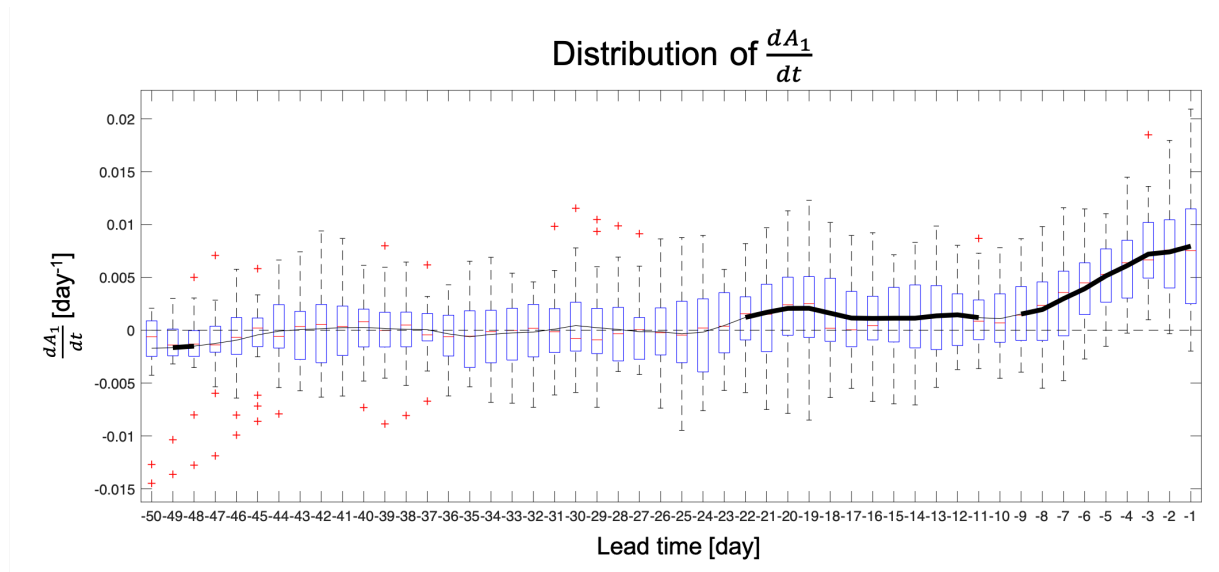

Figure R1: The distribution of  $\frac{dA_1}{dt}$  for all 25 SSW events in ERA-interim as a function of lead time. The bottom and top of each box are the 25th and 75th percentiles of the distribution. The red line in the middle of each box is the median of all SSW events. The whiskers extending above and below each box are the maximum and minimum. The red plus sign indicates the outliers, which lie at more than 1.5 times the interquartile range from the bottom or top of each box. The black line shows the mean of all SSW events and it is the same as the black line in Figure 3a and 3b. Bold parts of the black line indicate the values that are outside of the 2.5th to 97.5th percentile range of normal winter day values determined from bootstrapping as described in the main text.

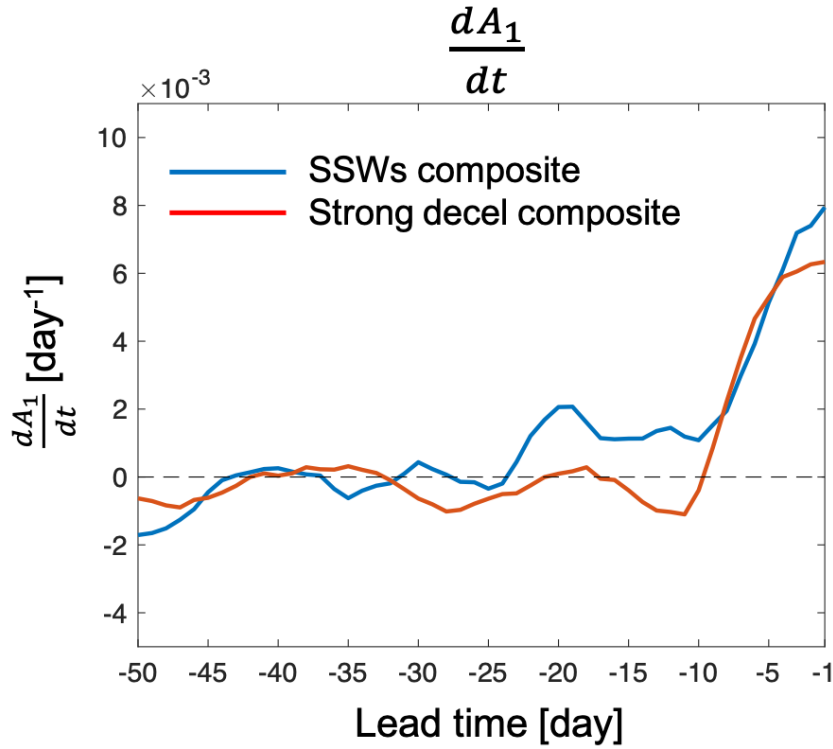

Figure R2: Composites of  $\frac{dA_1}{dt}$  as a function of lead time from 50 to 1 days before the onset of events. Blue is for SSW events and red is for strong deceleration events.

Overall, I think that it is probably important for you to comment in your paper on what can (or cannot) conclusively be physically implied about what your  $E_1$  EOF represents. For example, what processes might give rise to the potentially predictable (linear) behavior that you have identified 25 days prior to SSW onset? Is the SSW a culmination of those linear processes that somehow transition to nonlinear behavior (for e.g., finite amplitude ideas such as Nakamura et al. 2020 or resonance of some kind)? Or does the nonlinear behavior occur independently from the linear processes? In addition, in the future, it would be useful to determine whether  $E_1$ -type variability that occurs with or without a SSW might imply different levels of enhanced tropospheric subseasonal skill. In other words, if an SSW is required in order to make the stratospheric anomaly large enough to be associated with enhanced tropospheric forecast skill, but the SSW is ultimately only predictable 1-2 weeks ahead of time, then does that mean that the weaker stratospheric anomalies that are linearly predictable at 3-4 week leads may unfortunately be of lesser practical importance for forecasting tropospheric anomalies if they occur without a SSW? On the other hand, if  $E_1$ -type variability can be used to guide tropospheric forecasts even without a SSW occurring, that would be very useful information as well.

We agree with the reviewer that the question of which processes lead to the increase of the linear and nonlinear contributions in the  $A_1$  budget is important. In this study however, our focus is on the spatial patterns of linear and nonlinear PV flux terms as they can help us understand the linear and nonlinear contributions to the increase of  $\frac{dA_1}{dt}$ . We find that the spatial pattern

of the linear PV flux for wave-1 SSW events is largely stationary (Figure 7), which is due to the stationary spatial patterns of PV and  $v$  anomalies (Figure 8). Understanding the question of why the PV and  $v$  anomalies show these stationary patterns could help answer the question of which processes lead to the increase of linear and nonlinear contributions. However, in this study we do not focus on connecting the persistent anomalies to certain tropospheric weather events, like blocking, mid-latitude cyclones, etc. From the spatial pattern of the linear and nonlinear PV flux (Figure 7), the polar vortex tends to be displaced for wave-1 events and split for wave-2 events due to the rearrangement of the PV by the PV flux. As Reviewer 1 points out, our results are consistent with the results from Smith and Kushner (2012), and we cite the related previous studies that connect different processes to the linear and nonlinear contributions to the increase of  $\frac{dA_1}{dt}$ . For example, Smith and Kushner (2012) (and the references therein) suggested that the displacement events are preceded by sea level pressure anomalies associated with the Siberian high which is consistent with the increase of the linear meridional heat flux before the events. As another example, the increasing nonlinear signals from one week before the onset of wave-2 SSWs could be due to the resonance mechanism mentioned in Albers and Birner (2014). We agree that enhanced prediction skill in the troposphere is a very important question and worth further analysis. However, in the current study our focus is on finding dynamical circulation signals representative of SSWs. We leave the connection with the predictability of the troposphere for future work. We added a discussion on this topic in Lines 567-581.

Again, I don't have any conclusive answers to the above questions, but it is probably worth pointing out that your results do appear to generally agree with some recent results that myself and a co-author recently published (Albers and Newman ERL Feb. 2021). In short, our results suggest that linearly predictable stratospheric anomalies are associated with enhanced tropospheric predictive skill of the NAO. Of relevance here, is the fact that our results have some interesting similarities to what you have found in your paper. For example, similar to your results, we find that strong downward propagating stratospheric NAM anomalies are generally associated with linear processes for lags as far back as 25-30 days prior to 'stratospheric NAM event onset'. Likewise, we also find that nonlinear processes only become important 0 to 15 days prior to 'event onset' (denoted by stippling in our Fig. 1b). Interestingly, we were able to identify two types of dynamical modes (note, these are not EOFs), one single mode representing purely stratospheric processes (related to the NAM), and a second collection of modes representing coupled tropical tropospheric-stratospheric processes. In terms of subseasonal predictability, these modes account for a small fraction of overall NAO variance (see our Fig. 5c), which helps explain why subseasonal forecast skill is so low on average. We did not, however, provide any insight into which processes (purely stratospheric vs. tropical-stratospheric) are more important for subseasonal predictability (that is, we did not address the questions outlined in Domeisen et al. 2019 or Afargan-Gerstman and Domeisen 2020). On this note, does your  $E_1$ -EOF have any relationship to any forms of tropical variability?

Thank you for the insights and questions. While this study is not looking at tropospheric predictability specifically, we believe that the findings in your study mentioned in the comments

are very interesting and the question of which processes are the most relevant for subseasonal predictability is important. Even though we cannot provide an answer to the question, we combined the answer to the previous comment with this answer, and added the discussion in Lines 567-581.

In closing, you mention in your paper that you would like to explore the implications of your work in the context of actual subseasonal predictability. Given that you already have identified an EOF that you believe is important, one quick test you could do would be to project IFS hindcast data (or whatever your preferred S2S model is) onto your  $E_1$ -EOF and then calculate ‘forecasts of opportunity’ as periods when the forecasted  $E_1$ -EOF loading is particularly high. This would be a very rough way of identifying when the ‘signal’ part of a signal to noise calculation was particularly high, which typically equates to periods of higher forecast skill. If your  $E_1$ -EOF is identifying a ‘skillful’ portion of stratospheric variance, then these high loading periods may be associated with higher tropospheric skill (this type of ‘signal’ calculation is not as complete as computing the actual ‘signal-to-noise ratio’ as we did in our ERL paper, but it is easy to compute and seems to work reasonably well in some circumstances, e.g., Albers et al. WCD 2021).

Thank you for your suggestions. In fact, we have already projected ECMWF hindcast data onto  $E_1$  extracted from ERA-interim and found that more than 70% of SSW events can be identified using  $\frac{dA_1}{dt}$ . However, these results are part of ongoing work and will be the subject of a future manuscript. One major reason for not including these results in the current manuscript is that the model output from the S2S models does not contain PV, hence we had to re-write our equations using different variables, which required additional deliberations and care with regard to the analysis and results.

One final minor comment... for the de la Camara et al. paper that you reference, the ‘de’ and the ‘la’ are not capitalized.

Thank you for catching this. Change made.

## Response to Reviewer 1:

My first comment refers to the predictability of SSWs by analyzing the tendency of the PC of the first variability mode of PV. I was wondering if the authors have also studied the number of events that present a rapid increase of this PC but they are not SSWs. How many false alarms would you get? I guess these “false alarms” would correspond to minor stratospheric warmings. I am also curious about the opposite case. Have the authors identified any SSW that would not

be associated with a fast increase of this PC? In this regard, I am a bit concern about the first assumption of linearity to identify SSWs (i.e. the use of a PCA to identify these events). My concern is based on the importance of nonlinear processes in the development of some of these events (wave- 2 SSWs) that is shown later in the study.

Thank you for your comments. The goal of the current manuscript is not to use  $\frac{dA_1}{dt}$  or the corresponding contributors to identify or predict individual events but to find stratospheric signals representative of SSWs (from composites). For example, we found that  $\frac{dA_1}{dt}$  emerges at lead times of 3-4 weeks, which might indicate that the dynamical predictability of SSWs could be longer than 1-2 weeks, as has been commonly observed in the literature. The issue raised by the reviewer is an important question to address, and this is the topic of our ongoing study. If we look at the distribution of  $\frac{dA_1}{dt}$  for all 25 SSW events in ERA-Interim as shown in Figure R1 (see above, in the previous response to John Albers), one can see that more than 60% of SSWs have positive values of  $\frac{dA_1}{dt}$  at lead times of 20 days. The median of the SSW events (red line within the box) consistently shows positive values of  $\frac{dA_1}{dt}$  from around 20 days before the onset of the events. On the other hand, Figure 2a in the manuscript shows that there are some peaks in  $A_1$  that do not correspond to an SSW event. However we found that all the peaks (values larger than 0.01, which corresponds to one standard deviation in the  $A_1$  winter time series) correspond to a strong deceleration event (the deceleration of the zonal-mean zonal wind at 10 hPa and 60° N by more than 16.4 m/s in 10 days, which corresponds to the 60th percentile in terms of the strength of all wind deceleration events), which includes all SSW events. Since this study focuses on SSWs, we did not further investigate how different components in the PV equation contribute to  $\frac{dA_1}{dt}$  in the strong deceleration events and how they are different from SSW events. In ongoing work, we are using a time series classification-based method to study these differences and apply S2S re-forecast data to look into the accuracy (e.g., hit rate and false alarm rate) of using  $\frac{dA_1}{dt}$  at different lead times to identify an SSW event. We added a more careful discussion concerning these points in the conclusion in Lines 556-566.

Secondly, I am not sure if the authors are aware of the study by Smith and Kushner (2012) where they analyze the evolution of anomalies of eddy heat flux and their contributing terms at different vertical levels for displacement and split SSWs. Their results highly agree with some of this manuscript, particularly the relative role of linear and nonlinear processes and their timing for the development of displacement and split SSWs. It is true that there is not a straight relation between split and displacement SSWs and wave-2 and wave-1 events, but Ayarzaguen et al. (2019) repeated the analysis for the latter and found similar results. I think that it would be interesting to discuss and compare the results of the present manuscript with those of Smith and Kushner (2012).

Thank you for mentioning this study. As the reviewer points out, their results are highly consistent with our results. In fact, as we show in section 4 related to the physical interpretation of the mode decomposition, we can use the PV flux (and thus the wave activity) to interpret the results shown in section 3. To be more specific, we found that the linear (nonlinear) PV



flux is more important for the wave-1 (wave-2) SSWs, which agrees with the results on vertical wave activity in Smith and Kushner (2012). On the other hand, we also found that the linear and nonlinear terms are related more to wave-1 and wave-2 events than displacement and split events. We included a discussion in lines 323-327 and lines 417-421.

#### Specific comments

Lines 340-343: I was wondering if it would be a good idea to analyze SSWs in long simulations of more complex models such as CCMs. For instance, some CMIP6 models include interactive chemistry and provide daily output of long piControl simulations. I am suggesting this because I had the impression that the conditions in the ISCA model simulations are different from those in the reanalysis. For instance, there is no interannual variability in SSTs, but a strong warming in the equatorial Pacific is imposed. The evolution of the tendency of the PC1 is also different in the reanalysis and the model. It seems that SSWs might be only predicted in advance much later in the model than in reanalysis. Thus, it is not clear if the difference between reanalysis and model results is due to the short reanalysis sample or model biases.

Thank you for this comment. There are several potential reasons for why the behaviour of  $\frac{dA_1}{dt}$  and its contributors in the Isca model is not the same as that in the reanalysis. We agree that model biases and lack of representation of certain processes in the Isca model are part of the explanation for the differences with the reanalysis. We think that using the CMIP6 models with long piControl simulations as comparison is a good idea. However, the output daily data of CMIP6 only has 8 pressure levels, which is not enough to yield an accurate computation of potential vorticity and its budget. For this reason of lack of sufficient data, we did not use CMIP6 models for comparison. To better understand the influence of the number of events and the model biases on  $\frac{dA_1}{dt}$  in the Isca model, we randomly select 25 events from the 78 SSWs in the Isca model run and show  $\frac{dA_1}{dt}$  in blue in figure R3. The clear increase of  $\frac{dA_1}{dt}$  occurs around 10 days before the onset of the events, same as that of all SSWs in the Isca-model (red). Additionally, we used the output data to compute the  $A_1$  budget from a more complex climate model (ICON, Zängl et al. (2015), Giorgetta et al. (2018)) with prescribed observed SSTs, CO<sub>2</sub>, ozone, and aerosols concentrations following the monthly mean evolution of the 1979-2015 historical period (which contains most of the ERA-Interim period used in this study). The prescribed monthly mean prescribed values of SST allow the model to represent interannual variability and the teleconnections associated with El Niño-Southern Oscillation (ENSO). The ICON model has a higher resolution (~158km horizontally) and uses parameterizations of gravity wave drag and cloud microphysics, processes that are not included in the Isca model. There is a total of 42 SSWs in the ICON simulation.  $\frac{dA_1}{dt}$  of the ICON model simulation (green) shown in figure R3 and its variation is similar to that of the Isca model (red and blue) but with a clear increase at around 15 days before the events. If we randomly select 25 out of the 42 SSWs in ICON and repeat the analysis, the result is very similar (magenta). The figure suggests that for more complex models, the increase of the first PC tendency starts earlier and the tendency is more similar to the reanalysis (black). However, the large values of the tendency at around 20 days

cannot be reproduced in both the simplified and complex models used in this analysis and seem to be more related to model biases and variability than the averages of a large number of SSWs in the models. We modified the sentences in Lines 374-378 to clarify this aspect.

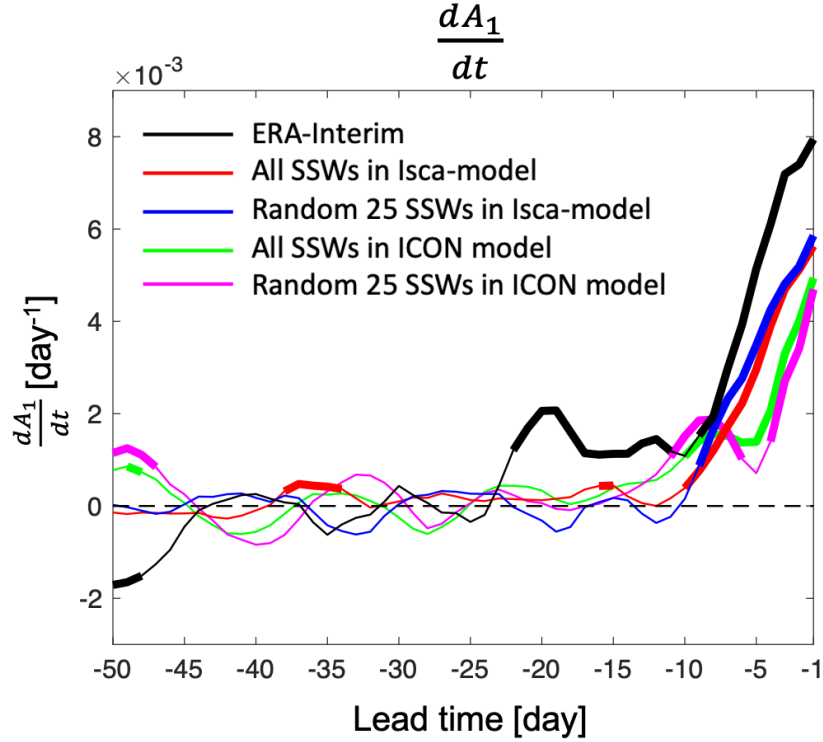

Figure R3:  $\frac{dA_1}{dt}$  as a function of lead time from 50 to 1 days before the onset of SSW events in different data sets. Black is for the 25 SSWs in ERA-Interim; red is for the 78 SSWs in Isca model output; blue is for 25 SSWs randomly selected from the 78 SSWs in the Isca model; green is for the 42 SSWs in ICON model output; pink is for 25 SSWs randomly selected from the 42 SSWs in the ICON model.

Lines 378-385: I would also highlight the positive (and statistically significant) values of the linear term for wave-2 SSWs just before the onset of events. Their values are of opposite sign to those for wave-1 events.

We modified the sentences in Lines 421-423 to read: “The linear zonal-mean PV flux for wave-2 SSWs is positive and statistically significantly different from the normal winter days just before the onset of SSWs, while the linear zonal-mean PV is negative and also statistically significantly different from normal winter days for wave-1 SSWs.”

Lines 426-445: I wonder if it would be helpful to represent in the same plot  $v_a^*$  and  $P_a^{**}$ , one in contours and the other in shading. This might help to clarify the relation between  $P_a^{**}$  and  $v_a^*$  and nonlinear PV flux.

We now changed Figure 9 and plotted  $v_a^*$  (green lines) on top of  $P_a^{**}$  (shading). Note that even though the main features of nonlinear PV flux as shown in Figure 7 can be roughly inferred by  $v_a^*$  and  $P_a^{**}$  in Figure 9, some of the weak features cannot be represented well. This is because

$\{P_a^{**}v_a^*\} \neq \{P_a^{**}\}\{v_a^*\}$ , where  $\{\}$  denotes the composite mean of SSW events. We added a discussion on this topic in Lines 483-485.

Technical corrections:

Line 348: I could not find the results that the authors mention in Figure 3 of Ayarzagüena et al (2019). Are the authors maybe referring to Figure 3 of Ayarzagüena et al (2018)?

Thank you for spotting this. Change made.

Line 382: I think a "be" before "found" is missing.

Thanks, change made.

## Response to Reviewer 2:

The mode decomposition analysis is a rather involved and difficult to interpret approach, but the authors have made significant efforts to connect their analysis to PV flux and wave- mean flow interaction diagnostics which are helpful. The results regarding the distinct processes leading to a wave-1 and a wave-2 warming are broadly consistent with other works that argue that wave-2 events evolve more rapidly, more non-linearly, more barotropically, and less predictably than wave-1 events.

However, much is made of the statistically significant precursors found in the time series of the leading EOF, their main metric for describing the evolution of the vortex; it motivates the title of the paper. Unfortunately, statistically significant composite signals preceding events don't imply anything about the predictability of the event in question. Just because the vortex weakens somewhat on average prior to the event does not imply that every time the vortex weakens a sudden warming will follow 25 days later. In other words - the composite suggests at most that this is a necessary condition, not at all that it is sufficient. To demonstrate evidence of predictability, the authors would need to identify relevant precursor events without reference to the warmings themselves, then show that warmings are more likely to occur following that event. This issue comes up in discussion of tropospheric 'precursors' to sudden stratospheric warmings all the time - there are statistically significant signals in the composite evolution prior to sudden warmings, but they turn out to be relatively useless as predictors because only a small subset of the tropospheric events are followed by a warming.

We thank the reviewer for the comments. Overall we agree with the reviewer and reframe the

implications of our study. We only use the word “predictability” when necessary.

In this manuscript we only aim to find signals that are representative of SSWs during their dynamical development rather than improving the predictability of SSWs. We agree that the positive  $\frac{dA_1}{dt}$  from the composite does not imply that  $\frac{dA_1}{dt}$  can be used to predict individual SSW events. However, the positive  $\frac{dA_1}{dt}$  in the composite is indeed a representative overall feature of SSWs. Based on the bootstrapping,  $\frac{dA_1}{dt}$  shown in the composite at lead times of 3-4 weeks is positive ahead of most SSWs, not just for specific SSW events. More specifically, the distribution of  $\frac{dA_1}{dt}$  for all 25 SSW events in ERA-interim (Figure R1) shows that the median of  $\frac{dA_1}{dt}$  is consistently above zero and around 70% of SSWs have positive values of  $\frac{dA_1}{dt}$  starting at lead times of around 20 days. We see the results of the present manuscript as a promising step that it is possible to improve the predictability of SSWs using more advanced methods. We also notice that large positive values of  $\frac{dA_1}{dt}$  (larger than one standard deviation of  $\frac{dA_1}{dt}$  of all winter days) correspond either to an SSW event or a strong polar vortex deceleration event (the deceleration of the zonal-mean zonal wind at 10 hPa and 60°N by more than 16.4 m/s in 10 days, which corresponds to the 60th percentile in terms of the strength of all wind deceleration events). However, the magnitude and persistence of the positive  $\frac{dA_1}{dt}$  in strong deceleration events composite are not as strong as those in SSW events composite (see Figure R2).

Related to the comment on the precursor signals in the troposphere, we believe that the signals found here are more directly related to and representative of SSWs than the tropospheric signals (as the reviewer pointed out, the signals found in the troposphere which many studies phrased them as “precursors” are not always followed by an SSW event) from a dynamical point of view. The tropospheric signals may not lead to a deceleration of the stratospheric zonal wind or an SSW event as Albers and Birner (2017) showed that only 1/3 of SSWs can be related to tropospheric precursors. While tropospheric anomalies can help to enhance the wave activity and generate more planetary waves propagating into higher levels, many previous studies showed that the stratospheric basic state is crucial for the upward propagation of planetary waves into the mid-to-upper stratosphere (e.g., Jucker 2016; Albers and Birner 2017). Therefore, an SSW event is the product of the interaction between the planetary wave and the mean wind flow in the stratosphere. The main reason why we believe the positive  $\frac{dA_1}{dt}$  is more directly related to and representative of SSWs is because  $E_1$  represents the variation of the polar vortex by design and the linear and nonlinear PV advection terms in the PV equation contribute to  $\frac{dA_1}{dt}$ . The linear and nonlinear PV advection terms can be related to the PV flux form as we showed in session 4 and they represent the interaction between the mean flow and the planetary wave activity. In a word,  $\frac{dA_1}{dt}$  represents not just one component (i.e., tropospheric signals or stratospheric mean state) but combined effect of both components. We added a discussion on this topic in Lines 556-566, including the following statement: “What we found here suggests that the intrinsic predictability of SSWs may be longer than the current two-week practical predictability. However, further work is still needed to investigate whether the predictability of SSWs can actually be extended, and if yes, how.”

I have a few other comments, some more substantial than others, but addressing this concern is essential, and will amount to major revisions. The authors should either reframe the results from a dynamical point of view and remove reference to predictability, or show evidence for predictability that justifies this emphasis.

As we mentioned in the previous response, in this manuscript we only aim to find signals that are representative of the dynamical development of SSWs rather than improving the predictability of SSWs. Using the signals (e.g., the positive  $\frac{dA_1}{dt}$ ) found in this study to identify each individual SSW event will be the subject of upcoming work. To clarify this, we modified the wording throughout the manuscript and reframed the implications of our results without addressing "predictability" (see the tracked changes version of the revised manuscript). We also changed the title of the manuscript "Emergence of representative signals for sudden stratospheric warmings beyond current predictable lead times".

### Further Comments

#### Climatology

It's not completely clear from the methodology just how the climatology has been computed, but the authors should consider imposing some kind of low-pass smoothing filter on the climatology if they haven't done so already. Given the finite number of years in the calculation, particularly for observations, there will be considerable residual high-frequency sampling variability that can artificially increase the small scale variance in the anomalies. This probably won't impact the low frequency modes too much, but it will affect the details of the high-frequency modes.

The climatology here is the mean value of each day of all the years available. We added a comment in Line 130 to make the definition of climatology clearer: "... obtained by computing the daily mean values of PV over all available years". As suggested by the reviewer, we applied a running-average (30-day running mean) to low-pass filter daily mean values over the available years. The results are shown in the figure below. The results are very similar to those shown in Figure 3. The main obvious difference is in  $N_{low-high}$ , which captures the interaction between the low and high frequency EOF modes without influencing our main conclusions. One reason for the very similar results between using low-pass filtered climatology and no low-pass filtered climatology is that applying PCA on the PV data already acts as a filter. The first PCs tend to capture low-frequency signals, while high-frequency signals (captured by further PCs) are discarded in the analysis. Our results show that the main contributions to the increase of  $\frac{dA_1}{dt}$  come from the first 25 EOF modes. We added a sentence in Lines 131-135 to clarify this aspect.

#### EOF calculation

From what I could understand, the EOF calculation has been carried out in two steps. The first analysis is used to obtain the structure of the leading EOF, then this variability is removed from the PV field and a separate calculation is carried out to obtain the remaining modes. It's not clear why this two step approach is adopted. I think it's connected as well to the fact that

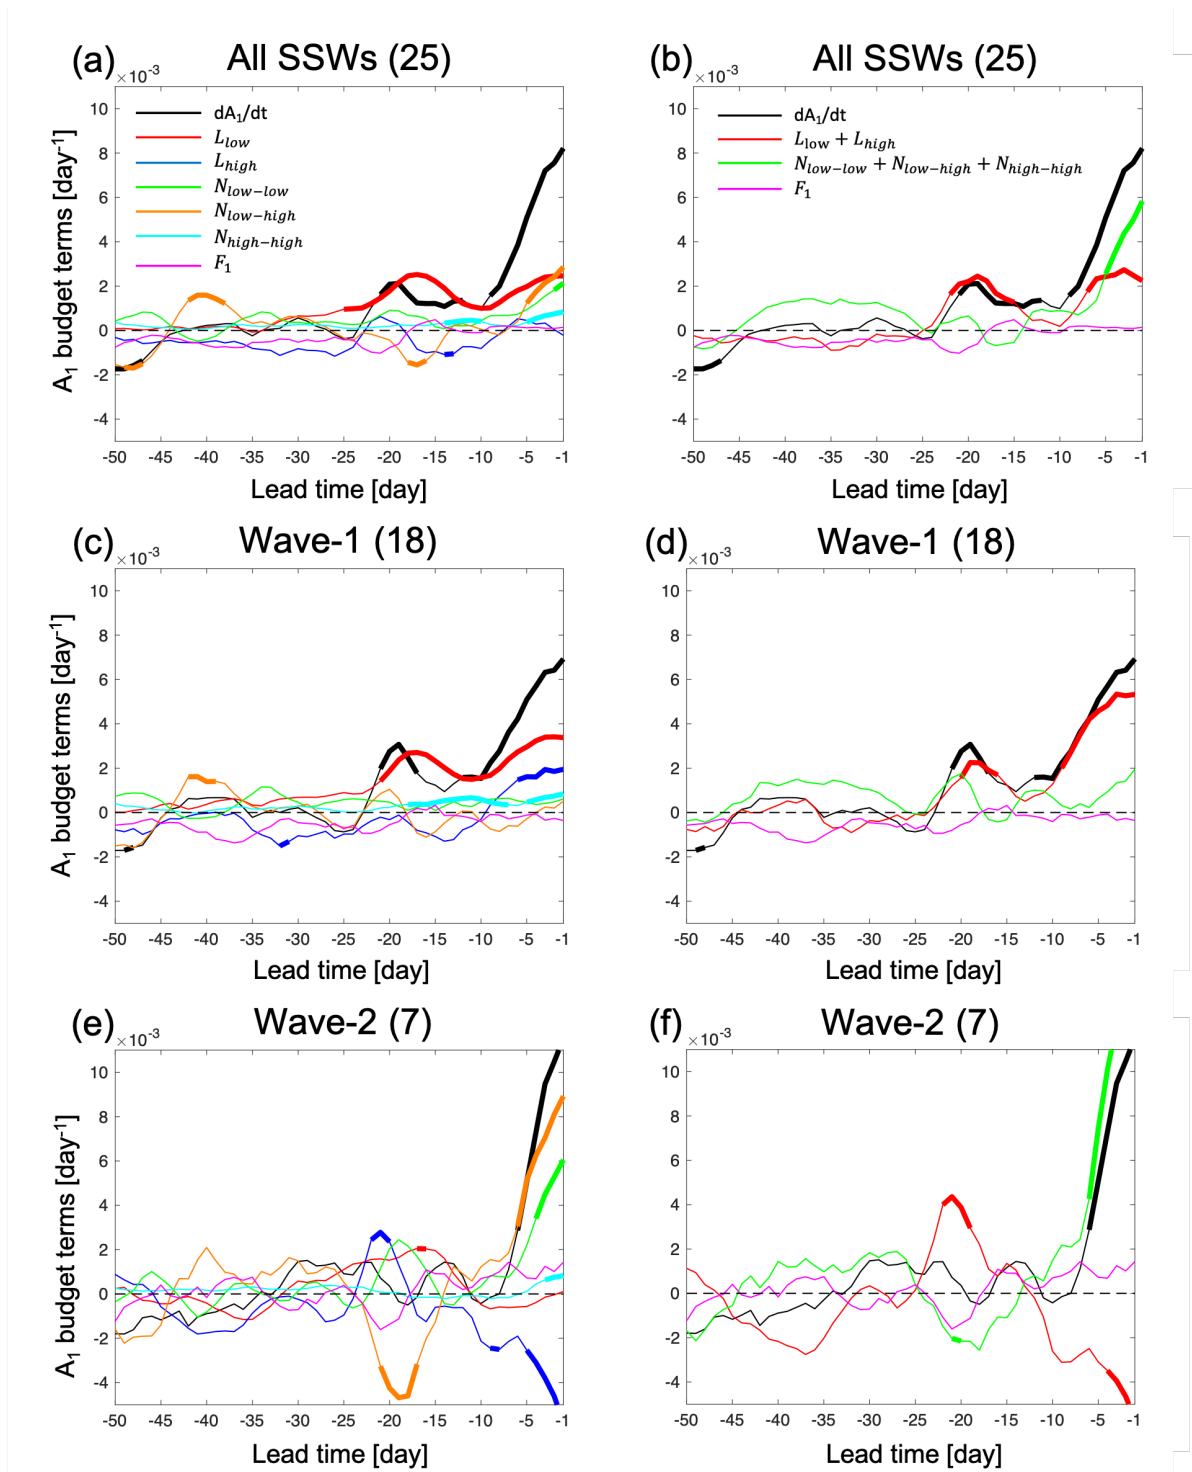

Figure R4: Same as Figure 3 in the manuscript but applying 30-day running mean of the daily climatology.

EOF 2 explains more variance than EOF 1 (Figs. 1, C1); I'm assuming that the percentage reported for EOF 2 is the fraction of the \*remainin\* variance that is explained by EOF 2. If this multi-step approach is important, this should be clearly explained and demonstrated.

The reason for using a two-step approach to obtain the EOF modes is that we want to obtain an EOF mode that best describes the variability of the polar vortex that is most directly related to the development of SSWs. This is achieved by computing the first EOF mode based only on data around the onset day of SSWs. Specifically, days -10 to +5 are used for this purpose. Applying PCA to all winter days leads to a first EOF mode that is different from the current EOF mode shown in Figure 1. The variance explained by EOF1 is smaller than that explained by EOF2 because EOF1 is derived only from data around SSW events. EOF1 is therefore concentrated on SSW characteristics, and it does not capture all the information contained in the whole winter data, which generally displays less variability than is observed around SSW events. The remaining EOFs are derived directly from the whole winter data after removing its projection onto EOF1. It should therefore not be surprising that EOF2 captures more variance of the whole winter data than EOF1. After we combined the EOFs from the two EOF mode decompositions, we computed the explained variance of this combined basis for the whole winter data. We added a discussion and clarification of this method in Lines 137-143 and Line 156-159.

#### Description of ISCA model

The processes and parameterizations used should be briefly discussed; calling it 'intermediate' complexity is a bit ambiguous. E.g. is there a gravity wave drag parameterization? Realistic radiation? Ozone variability? etc.

We now added a more detailed description of the model in Lines 107-115.

#### Bootstrap methodology

The bootstrap methodology for computing statistical significance is reasonable, but the authors should use non-SSW days that have the same seasonal distribution as the SSW days to avoid aliasing with the seasonal cycle.

Since we removed the daily climatology of PV to obtain the EOF modes and corresponding PC time series, the evolutions of the first PC and its contributors do not contain the seasonal cycle. As the reviewer suggested that the bootstrapping should reflect the temporal distribution of SSWs, we repeated the analysis to use non-SSW days only during December, January, February, and March (during the typical months of occurrence of SSWs). The results are very similar and do not change our main conclusions. We added a sentence in Line 276-279.

#### Minor comments:

-Sign convention for leading EOF: At present a positive A1 anomaly corresponds to a weakening of the vortex. This makes the descriptions awkward to me, e.g. in the abstract: the leading PC is an 'indicator of the strength of the polar vortex' but an increase indicates a deceleration. This took me a while to understand. The opposite sign convention might be more intuitive.

The first PC is an indicator of the strength of the vortex which can go in both directions, and positive PC values here indicate a weakening of the vortex, and therefore the potential

occurrence of SSWs. We added a footnote in the manuscript to clarify it.

l48: the statistics are closer to two in three winters.

Thanks, change made.

Part 1 of the two papers published by Domeisen et al. in 2020 is labeled Domeisen et al. 2020b, and part 2 is labeled Domeisen et al. 2020a. The citations are appropriate as labeled, but they confused me because I am used to the more sequential ordering.

This is unfortunately not something we can change in the latex template. The journal might be able to change this during copy-editing.



# Emergence of representative signals for sudden stratospheric warmings beyond current predictable lead times

Zheng Wu<sup>1</sup>, Bernat Jiménez-Esteve<sup>1</sup>, Raphaël de Fondeville<sup>2</sup>, Enikő Székely<sup>2</sup>, Guillaume Obozinski<sup>2</sup>, William T. Ball<sup>3</sup>, and Daniela I.V. Domeisen<sup>1</sup>

<sup>1</sup>Institute for Atmospheric and Climate Science, ETH Zürich, Switzerland

<sup>2</sup>Swiss Data Science Center, ETH Zürich and EPFL, Switzerland

<sup>3</sup>Department of Geoscience and Remote Sensing, Faculty of Civil Engineering and Geosciences, TU Delft, the Netherlands

**Correspondence:** Zheng Wu (zheng.wu@env.ethz.ch)

**Abstract.** Major sudden stratospheric warmings (SSWs) are extreme wintertime circulation events of the Arctic stratosphere that are accompanied by a breakdown of the polar vortex and are considered an important source of predictability of tropospheric weather on subseasonal to seasonal time scales over the Northern Hemisphere mid- and high- latitudes. However, SSWs themselves are difficult to predict, with a predictability limit of around one to two weeks. The predictability limit for determining the type of event, i.e., wave-1 or wave-2 events, is even shorter. Here we analyze the dynamics of the vortex breakdown and look for early signs of the vortex deceleration process at lead times beyond the current predictability limit of SSWs. To this end, we employ a mode decomposition analysis to study the potential vorticity (PV) equation on the 850 K isentropic surface by decomposing each term in the PV equation using the empirical orthogonal functions of the PV. The first principal component (PC) is an indicator of the strength of the polar vortex and starts to increase from around 25 days before the onset of SSWs, indicating a deceleration of the polar vortex. A budget analysis based on the mode decomposition is then used to characterize the contribution of the linear and nonlinear PV advection terms to the rate of change (tendency) of the first PC. The linear PV advection term is the main contributor to the PC tendency at 25 to 15 days before the onset of SSW events **for both wave-1 and wave-2 events**. The nonlinear PV advection term becomes important between 15 to 1 days before the onset of wave-2 events, while the linear PV advection term continues to be the main contributor for wave-1 events. By linking the PV advection to the PV flux, we find that the linear PV flux is important for both types of SSWs from 25 to 15 days prior to the events but with different wave-2 spatial patterns, while the nonlinear PV flux displays a wave-3 wave pattern, which finally leads to a split of the polar vortex. **Early signs of SSW events arise before the one to two week prediction limit currently observed in state-of-the-art prediction systems, while signs for the type of event arise at least one week before the event onset.**

Major sudden stratospheric warmings (SSWs) (Baldwin et al., 2021) are extreme wintertime circulation events of the Arctic stratosphere that are accompanied by a breakdown of the polar vortex which **consists** of strong circumpolar westerly winds in the **polar** stratosphere that form in fall and decay in spring. During a major SSW event the zonal-mean zonal wind in the stratosphere reverses in mid-winter from westerly to easterly, accompanied by an abrupt increase of temperatures in the entire polar stratosphere (Labitzke, 1981). SSWs are caused by the interaction between planetary waves and the mean flow in the stratosphere (Matsuno, 1971; McIntyre, 1982). The planetary waves are generated in the troposphere by flow over mountains, land-sea thermal contrast, and nonlinear synoptic scale wave-wave interactions (Charney and Eliassen, 1949; Scinocca and Haynes, 1998; Held et al., 2002; Domeisen and Plumb, 2012). The waves can propagate upward into the stratosphere if their wave number is sufficiently small (e.g., wave-1 and wave-2 components) and if the background zonal-mean zonal wind is eastward relative to the zonal phase speed of the waves (Charney and Drazin, 1961). When these planetary waves reach a critical level in the stratosphere, they break and deposit easterly momentum into the mean flow, resulting in a deceleration of the mean flow, which can eventually lead to a breakdown of the polar vortex, **and an SSW event if the winds reverse to easterlies (Charlton and Polvani, 2007). The predictability limit for SSW events in state-of-the-art subseasonal prediction systems is around one to two weeks (Domeisen et al., 2020b)**. After an SSW event, the stratospheric anomalies can propagate downward to the lower stratosphere and influence the tropospheric weather for up to two months after the onset of events (Baldwin and Dunkerton, 2001; Kidston et al., 2015). For example, SSWs are found to be associated with an anomalously negative phase of the North Atlantic Oscillation (Domeisen, 2019) and an equatorward shift of the tropospheric extratropical jet streams (Baldwin and Dunkerton, 2001; Limpasuvan et al., 2004). The shift of the jet is crucial for the weather over North America and Europe, as it can lead to a larger probability of cold air outbreaks (Kolstad et al., 2010; King et al., 2019). Therefore, SSWs are thought to be an important source of predictability on subseasonal to seasonal (S2S) time scales over the Northern Hemisphere (NH) mid- and high latitudes (Mukougawa et al., 2009; Scaife et al., 2016; Karpechko et al., 2017). Improving the predictability of SSW events may therefore help to enhance the forecast skill in the troposphere (Sigmond et al., 2013; Domeisen et al., 2020a).

Even though the polar vortex undergoes deceleration and disruption during all major SSW events, there are large differences amongst SSW events in terms of their dynamical evolution, vortex structure, and downward impact on the troposphere. Based on the geometry of the polar vortex at the onset of the event, SSWs can be classified into two types: 1) vortex displacement events, when the vortex is shifted off the pole, and 2) vortex split events, when the vortex is split into two parts (Charlton and Polvani, 2007). While displacement events are mainly attributed to the enhanced upward propagation of wavenumber 1 waves (hereafter: wave-1), split events are often related to strong wavenumber 2 waves (hereafter: wave-2) (Nakagawa and Yamazaki, 2006). **In observations, major SSWs occur in about two out of three winters (Charlton and Polvani, 2007) with a similar frequency of split and displacement events (Butler et al., 2015), but with high decadal variability (Domeisen, 2019)**. However, if SSWs are classified based on the zonal wavenumber of the wave flux in the lower stratosphere, there are more wave-1

events than wave-2 events as not all split SSWs are dominated by wave-2 wave flux (Bancalá et al., 2012; Ayarzagüena et al., 2019). The occurrence of Split events tends to be less predictable than that of displacement events, especially at lead times of 1-2 weeks (Taguchi, 2018; Domeisen et al., 2020b). Given the fact that the development of the two types of SSW events is considered to be different (Matthewman et al., 2009; Albers and Birner, 2014), the dynamical processes that lead to the breakdown of the polar vortex should be distinct between displacement (wave-1) and split (wave-2) events and should also be distinguishable from normal winter days (**without SSWs**). Therefore, understanding the dynamics of the vortex disruption and identifying signals that contribute to the vortex deceleration are crucial for improving the predictability of SSWs and of each type of event, and ultimately, of the weather at the Earth's surface.

Since the stratospheric circulation is well described by Ertel's potential vorticity (PV) (McIntyre, 1982), the evolution of the polar vortex during SSWs can also be captured by the changes in the values and structure of the PV in the stratosphere. As discussed above, while the polar vortex undergoes breakdown in each major SSW event, the associated vortex structures are different for the two types of SSW events. Decomposing the PV into an empirical orthogonal function (EOF) basis, we can identify the PV structure that best describes the weakening of the polar vortex and subsequently investigate how its corresponding principal component (PC) changes with time. By projecting the other variables from the PV equation (i.e., the zonal and meridional wind) onto the EOF basis from PV, one can analyze the contribution of each term of the equation to the changes in the PC time series in order to identify the dynamical processes that are the most relevant for the weakening of the polar vortex. This approach was proposed by Aikawa et al. (2019) and called *mode decomposition analysis*. Aikawa et al. (2019) applied the mode decomposition analysis to diagnose the atmospheric blocking development in the Eastern Pacific and Central Atlantic, and demonstrated that the blocking index can be faithfully reconstructed using only the first 10 EOF modes. The vorticity equation was then decomposed into three terms (i.e., linear advection, nonlinear mode-to-mode interaction, and dissipation), and their contribution to the combined time evolution of the first 10 PC time series was subsequently investigated. Their results showed that the nonlinear interaction terms contribute to the increase in the amplitude of the blocking index in both regions (Eastern Pacific and Central Atlantic), but **that their contributions are different**. Since each term in the vorticity equation **can be linearly reconstructed using the EOF** modes (that correspond to specific spatial patterns) and the PCs, this method allowed the identification of the wind and vorticity patterns that are crucial for the development of the blocking. As the results from Aikawa et al. (2019) indicate the effectiveness of mode decomposition analysis in studying dynamically-driven events, we use the same method to study the development of SSWs, which are also driven by wave dynamics (e.g., Matsuno, 1971). Indeed, we find that the vortex weakening can be represented by the evolution of the EOF modes extracted from PV. We therefore employ a budget analysis of the PV equation in the stratosphere to quantify the contribution of each EOF mode to the dynamical processes that lead to the deceleration of the polar vortex and the subsequent onset of SSWs.

The onset of SSW events is associated not only with the anomalously large excitation of wave activity in the troposphere (Matsuno, 1971; Polvani and Waugh, 2004; Lindgren et al., 2018), but also with the stratospheric mean state and stratospheric wave anomalies prior to SSWs (Hitchcock and Haynes, 2016; Jucker, 2016; Birner and Albers, 2017; de la Cámara et al., 2019). Moreover, split and displacement SSW events exhibit distinct pre-warming evolutions (Charlton and Polvani, 2007;

Matthewman et al., 2009; Bancalá et al., 2012; Albers and Birner, 2014). For example, the zonal wavenumber of the wave flux leading to the breakdown of the polar vortex can be different for the two types of SSW events (e.g., Bancalá et al., 2012). Some studies suggest that the explosive growth of wave amplitude is triggered by resonant behavior, which is also different between the two types of SSW events (e.g., Esler and Matthewman, 2011; Matthewman and Esler, 2011). Albers and Birner (2014) further suggest that different effects of planetary Rossby and/or gravity waves are responsible for producing the distinct vortex preconditioning that is conducive to developing the respective split and displacement SSWs events. Given the distinct dynamical developments of the two types of SSWs, one should be able to observe different evolutions of the PV terms by the mode decomposition analysis for each type of SSW event. **Since displacement (split) events are mainly related to wave-1 (wave-2) wave activity, in this study, SSWs are classified into wave-1 and wave-2 events based on the dominant wavenumber that leads to the breakdown of the vortex.** As some studies point out that the dynamical process of the vortex breakdown starts earlier than the current predictable lead time of two weeks (Polvani and Waugh, 2004; Jucker and Reichler, 2018), one would expect to see signals indicative of the vortex breakdown appearing in the mode equation budget before the onset of the SSWs. Our goal in the current study is therefore to identify signals that are representative of SSWs, i.e., distinct from normal winter days, ahead of the vortex breakdown with lead times longer than two weeks, and to distinguish onset signals for wave-1 and wave-2 events beyond the currently achieved predictable lead times.

The paper is organized as follows. Section 2 describes the data used in the analyses and the methodology behind the mode decomposition analysis. Section 3 shows the results of the analysis and their implications. Section 4 further provides the physical interpretation of the signals found in the mode equation budget by linking them with wave-mean flow interactions. Conclusions are given in Section 5.

## 2 Data and methodology

### 2.1 Data and EOF basis

We use two data sets for analysis in this paper: 1) the ERA-Interim reanalysis (Dee et al., 2011), and 2) simulations from an intermediate complexity configuration of the Isca model (Vallis et al., 2018), **that we further call here the “simplified Isca model”.** This version of the Isca model uses the model configuration from Jiménez-Esteve and Domeisen (2019), and it includes moist and radiative processes through evaporation from the surface and fast condensation. Water vapour in the atmosphere interacts with a multiband radiation scheme (Mlawer et al., 1997) and a simple Betts-Miller convection scheme (Betts and Miller, 1986). The CO<sub>2</sub> concentration is fixed at 300ppm and the seasonal cycle of ozone in the stratosphere is prescribed based on the ERA-Interim (1979-2016) climatology. For the lower boundary conditions, the simplified Isca model uses realistic topography and the continental outline from the ECMWF model, and sea surface temperatures (SST) are prescribed, however it does not include a representation of clouds, interactive chemistry, or

**gravity wave drag. More details about the model configuration can be found in Jiménez-Esteve and Domeisen (2019).** In this paper, we use the experiment that uses prescribed strong El Niño-like SST anomalies as described in Jiménez-Esteve and Domeisen (2019). The motivation to use this model experiment is that it produces a realistic climatology and a frequency  
120 of SSWs that is similar to the reanalysis.

For ERA-Interim, we use daily mean fields of potential vorticity (PV)  $P$ , zonal wind  $u$ , and meridional wind  $v$  at the 850 K isentropic level from 1979-2018 with a horizontal resolution of  $2.5^\circ \times 2.5^\circ$ . Only data north of  $30^\circ\text{N}$  (24 latitude values by 144 longitude values leading to a total of  $D = 3456$  grid points) from the winter season (October to April) are included in the analysis. For the Isca model simulations, the daily vertical gradient of potential temperature ( $\theta$ ), zonal wind  $u$ , and meridional  
125 wind  $v$  are interpolated to the 850 K isentropic surface from pressure levels. The simplified Isca model data contains a total of 130 years and uses a T42 horizontal resolution. The PV is computed as

$$P = (\zeta_\theta + f) \left( -g \frac{\partial \theta}{\partial p} \right), \quad (1)$$

where  $P$  is Rossby-Ertel’s PV (Hoskins et al., 1985),  $\zeta_\theta$  is the relative vorticity on the isentropic surface,  $\theta$  is the potential temperature,  $f$  is the Coriolis force,  $g$  is the gravity, and  $p$  is the pressure. Note that in this work potential vorticity (PV) refers  
130 to Rossby-Ertel’s PV.

The PV data (for both the ERA-Interim reanalysis and the simplified Isca model) is further decomposed into: 1) the daily climatology, obtained by **computing the daily mean values of PV over all available years**, and 2) daily anomalies with respect to the climatological seasonal cycle. **Given the limited number of years in the reanalysis, we also applied 30-day running mean to the daily climatology to remove the high-frequency variability and repeat the same analysis in the**  
135 **study. The results are almost identical to the ones using climatologies without low-pass filtering, which is mainly due to the fact that applying PCA acts as a filtering and indicates the importance of the low-frequency components in the evolution of the polar vortex. In the following figures, we show the results using climatologies without low-pass filtering.** The EOF modes of the PV and their corresponding PC time series (later used in the mode decomposition analysis) are obtained by employing principal component analysis (PCA) on the daily PV anomalies at 850 K. **The procedure consists of applying**  
140 **PCA twice, as described in the following. We apply a first PCA only to the PV data around the onset date of all SSWs (from -10 to +5 days around the onset date). The motivation behind this first PCA is to obtain a mode that captures the characteristics of SSWs. The spatial pattern of the resulting first EOF mode ( $E_1 \in \mathbb{R}^D$ ) is shown in the first panel in Figure 1, with a wavenumber 0 structure centered at the pole. Next, we project the whole winter data (October to April) onto the subspace orthogonal to  $E_1$  by subtracting from the winter data its projection onto  $E_1$ , and then perform a second PCA**  
145 **on this projection. The resulting data does not contain any information from  $E_1$  since it is in the space orthogonal to  $E_1$ , and yields a total of  $D = 3456$  modes  $\{E_2, \dots, E_{D+1}\}$  (equivalent to the number of grid points). Combining the first EOF mode  $E_1$  from the first PCA with the  $D$  EOF modes from the second PCA forms an orthogonal basis for the whole winter data, referred to in the following as the “combined set of basis vectors”. Figure 1 shows the spatial pattern of the first 10 EOF modes that explain together  $\approx 71\%$  of the variance of the PV anomalies of all winter days in the ERA-Interim data. The spatial**

150 patterns of the first 10 EOF modes of the PV anomalies in the simplified Isca model data is shown in Figure C1 in Appendix C. We note that the EOF modes cannot be interpreted by default as physical modes as discussed also in Dommenges and Latif (2002) and Monahan et al. (2009). Here, since  $E_1$  is derived using only days around SSWs (-10 to +5 days around the onset date of SSWs) and displays a clear zonally symmetric structure, the physical process represented by the variation of  $E_1$  can be interpreted as representing the changes in the strength of the polar vortex during SSWs. In  
 155 ERA-Interim, the variance explained by  $E_1$  (15.8%) for the whole winter data is slightly smaller than that of  $E_2$  (16.8%), as shown in Figure 1. The EOF modes are orthogonal and therefore satisfy the following relationship of the inner product  $\langle \cdot, \cdot \rangle$ ,

$$\langle E_m, E_n \rangle = \int_{\Omega} E_m E_n dx = \delta_{mn}, \quad m, n = 1, \dots, D + 1, \quad (2)$$

where  $\delta_{mn}$  is the Kronecker delta function, and  $\Omega$  is the region poleward of  $30^\circ\text{N}$ . As mentioned above, the main motivation for applying the double PCA approach to obtain the EOF basis rather than directly applying PCA once to all the winter  
 160 days is that  $E_1$  is computed from the days around the onset day of SSWs, and its variability is therefore closely linked to SSW events, as can be seen from Figure 2. The PC time series of all winter days associated with  $E_1$  (Figure 2) is highly correlated with the polar-cap averaged temperature at 30 hPa, thus being a good representation of SSWs (Blume et al., 2012). The evolution of the first PC (for all winter data) therefore enables us to better understand the vortex breakdown process.

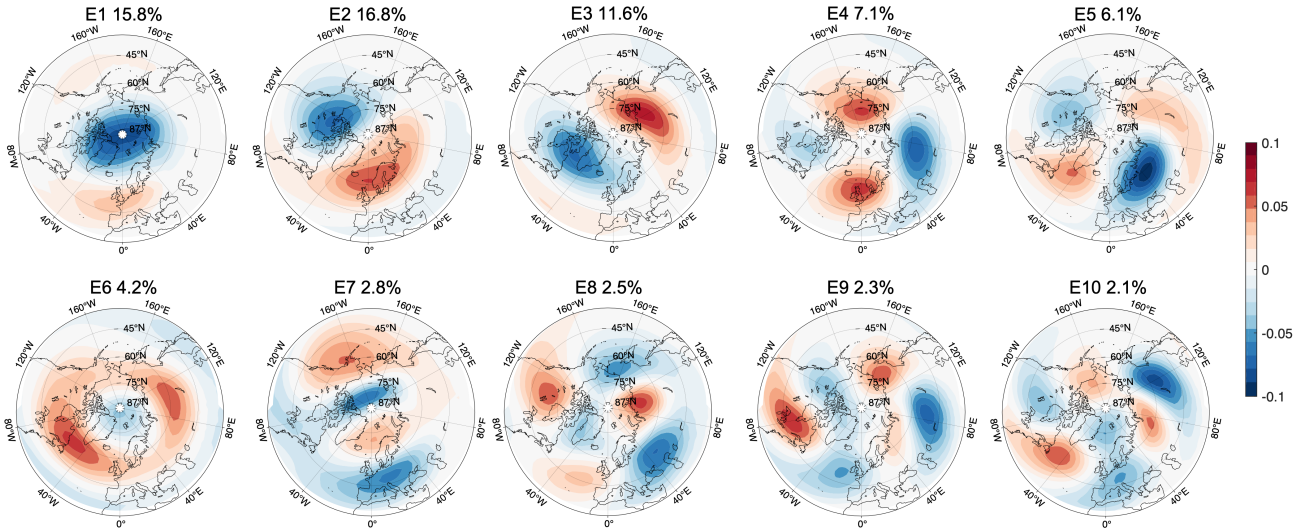

**Figure 1.** The first 10 EOF spatial patterns of PV at 850 K ( $E_1, E_2, \dots, E_{10}$ ) of the combined set of basis vectors as described in the text using ERA-Interim daily data. The percentage number indicates the variance explained by each EOF.

## 2.2 Mode decomposition analysis

165 Following the methodology from Aikawa et al. (2019), the mode decomposition analysis is applied to the PV conservation equation to study the dynamical development of SSW events. The anomalous PV equation on an isentropic surface can be written by separating the daily anomalies from the daily climatological mean for 1979-2018 as

$$\frac{\partial P_a}{\partial t} + \mathbf{V}_c \cdot \nabla P_a + \mathbf{V}_a \cdot \nabla P_c + \mathbf{V}_a \cdot \nabla P_a = F_a, \quad (3)$$

170 where  $P$  is the PV,  $\mathbf{V}$  is the wind vector field, and  $F$  is the forcing term (computed here as residual). The subscript  $c$  refers to daily climatology, and  $a$  refers to daily anomalies. The anomalous PV tendency ( $\frac{\partial P_a}{\partial t}$ ) equals the sum of linear effects that consist of the advection of daily anomalous PV by climatological wind vector ( $\mathbf{V}_c \cdot \nabla P_a$ ) and the advection of climatological PV by the anomalous wind vector ( $\mathbf{V}_a \cdot \nabla P_c$ ), and the nonlinear effects of the advection of anomalous PV by the anomalous wind vector ( $\mathbf{V}_a \cdot \nabla P_a$ ).

175 For the mode decomposition analysis of the PV equation, we focus only on the time frame between 50 to 1 days prior to the onset day of SSW events **as the goal of this study is to identify signals that precede SSWs. We project the PV field (obtained by concatenating the data from -50 to -1 days before the onset of all SSWs)** onto the first  $d=1000$  modes of the combined set of basis vectors  $\{E_1, E_2, \dots, E_d\}$  and get the corresponding PC time series, denoted as  $\{A_1, A_2, \dots, A_d\}$ . We found that the first  $d=1000$  modes are sufficient to reproduce the actual rate of change of the PCs that is introduced below. The PV daily anomalies ( $P_a$ ) can be expressed as the linear combination of  $\{E_1, E_2, \dots, E_d\}$  with coefficients  $\{A_1, A_2, \dots, A_d\}$ .  
 180 For the wind vector daily anomalies ( $\mathbf{V}_a$ ), the temporal evolution of PV is correlated with that of the wind fields. Therefore, it is possible to obtain a set of spatial patterns  $\{\mathbf{U}_1, \mathbf{U}_2, \dots, \mathbf{U}_d\}$  for  $\mathbf{V}_a$  by regressing  $\mathbf{V}_a$  onto the PC time series of PV,  $\{A_1, A_2, \dots, A_d\}$ . Note that the spatial patterns  $\{\mathbf{U}_1, \mathbf{U}_2, \dots, \mathbf{U}_d\}$  are not orthogonal as they are not obtained through an EOF mode decomposition. The  $\mathbf{V}_a$  can then be represented as the linear combination of  $\mathbf{U}_1, \mathbf{U}_2, \dots, \mathbf{U}_d$  with coefficients  $A_1, A_2, \dots, A_d$ . Then, by substituting the projection of  $P_a$  and  $\mathbf{V}_a$  onto the PC time series into Eq. (3) and taking the inner  
 185 product between Eq. (3) and a given EOF mode  $E_k$ , we obtain the mode equation budget of the rate of change (or tendency) of  $A_k$  as (detailed derivation in Appendix A)

$$\frac{dA_k}{dt} = \frac{1}{C_k} \left( - \sum_{n=1}^d L_{kn}^A A_n - \sum_{n=1}^d L_{kn}^B A_n - \sum_{m=1}^d \sum_{n=1}^d N_{kmn} A_m A_n + F_k \right), \quad (4)$$

190 where  $C_k = \langle A_k, A_k \rangle$  is the eigenvalue associated with mode  $E_k$ ;  $L_{kn}^A = \langle E_k, \mathbf{V}_c \cdot \nabla E_n \rangle$  and  $L_{kn}^B = \langle E_k, \mathbf{U}_n \cdot \nabla P_c \rangle$  are the inner products between the linear advection terms ( $\mathbf{V}_c \cdot \nabla E_n$  and  $\mathbf{U}_n \cdot \nabla P_c$ ) and  $E_k$ ;  $N_{kmn} = \langle E_k, \mathbf{U}_m \cdot \nabla E_n \rangle$  is the inner product between the nonlinear advection term ( $\mathbf{U}_m \cdot \nabla E_n$ ) and  $E_k$ ; and  $F_k = \langle E_k, F_a \rangle$  is the residual term. The sum of the two linear advection terms gives the total linear advection term. Using Eq. (4), we then compute the contribution of each mode to the linear and nonlinear advection terms and thus to the total rate of change of  $A_k$  to determine which modes (or combinations of modes) play an important role in identifying signals distinguishing SSWs from normal winter days.

From the power spectrum of each PC time series  $A_k$  (not shown), the power of  $A_1$  to  $A_{25}$  is concentrated at frequencies lower than once a week, which is different from the power spectrum of the other PCs beyond  $A_{25}$ . Based on these power spectra, here we consider the associated modes  $E_1$  to  $E_{25}$  as low modes, which together explain around 85% of the total variance, and modes beyond  $E_{25}$  as high modes. To separate the contributions from low and high EOF modes, the summation over all modes from Eq. (4) is divided into the summation of low modes and that of high modes. Thus, Eq. (4) can be written as

$$\begin{aligned} \frac{dA_k}{dt} &= \frac{1}{C_k} \left( - \sum_{n=1}^l (L_{kn}^A + L_{kn}^B) A_n - \sum_{n=l+1}^d (L_{kn}^A + L_{kn}^B) A_n \right. \\ &\quad \left. - \sum_{m=1}^l \sum_{n=1}^l N_{kmn} A_m A_n - \sum_{m=1}^l \sum_{n=l+1}^d (N_{kmn} + N_{knm}) A_m A_n - \sum_{m=l+1}^d \sum_{n=l+1}^d N_{kmn} A_m A_n + F_k \right) \\ &= \frac{1}{C_k} (L_{low} + L_{high} + N_{low-low} + N_{low-high} + N_{high-high} + F_k), \end{aligned} \quad (5)$$

where  $l = 25$  represents the  $n$ th mode that is treated as the last low mode;  $L_{low}$  and  $L_{high}$  are the linear low and high mode terms, respectively;  $N_{low-low}$ ,  $N_{low-high}$  and  $N_{high-high}$  are the contributions from nonlinear low-low, low-high, and high-high mode interactions, respectively. We performed sensitivity tests for a range of  $l$  values, and our results and conclusions are robust for values of  $l > 25$ . Moreover, the contribution from modes higher than  $l = 25$  is very small (not shown). In this study, we only focus on the rate of change of the first PC time series  $\frac{dA_1}{dt}$  ( $k = 1$ ) due to the strong relationship between  $A_1$  and SSWs.

### 2.3 SSW definition and PV flux

The major SSW definition follows the criterion of Charlton and Polvani (2007), based on the reversal of the daily zonal-mean zonal winds at 10 hPa and 60°N, and a return to westerlies afterward for at least 10 consecutive days before the final warming. Two events in the same season are treated as distinct SSWs if they are separated by at least 20 days. The central dates of split and displacement SSW events in ERA-Interim before 2014 are taken from Karpechko et al. (2017) and consist of 11 split events and 12 displacement events. In addition, we added the SSW event in 2018, which is classified as split event based on the vortex geometry (Charlton and Polvani, 2007). The definition of wave-1 and wave-2 SSW events is based on the eddy heat flux at 100 hPa and 60°N similar to Bancalá et al. (2012). If the wave-2 component of eddy heat flux is larger than the wave-1 component by 15 Kms<sup>-1</sup> in the period of -2 to 0 days before the SSW event for at least 1 day, then the SSW event is classified as a wave-2 event, otherwise as a wave-1 event. Note that the time window around the SSW event (day -2 to day 0) that is used to classify the type of event is shorter than that in Bancalá et al. (2012). The reason for using a shorter window is to reduce the overlap between the time interval used to define the type of SSW event and the lead times that emerge as relevant in the predictability of wave-1 vs. wave-2 events. According to this definition, there are 18 wave-1 and 7 wave-2 SSW events in ERA-Interim. Note that not all split events are dominated by wave-2 wave flux (only 6 out of 12 split SSWs are also classified as wave-2 events), while one displacement event is dominated by wave-2 wave flux according to this definition.



In order to provide a physical interpretation for each term in Eq. (4) and understand the physical process that can lead to the disruption of the polar vortex, we introduce the poleward flux of PV on an isentropic surface given by Tung (1986) as

$$225 \quad \nabla \cdot \mathcal{F} = [\rho_\theta][(\rho_\theta P^{**})v^*] \cos \phi, \quad (6)$$

where  $\mathcal{F}$  is the Eliassen-Palm flux (EP flux),  $P$  is the potential vorticity,  $v$  is the meridional wind,  $\rho_\theta$  is the density in isentropic coordinates, defined as  $\rho_\theta = -\frac{1}{g} \frac{\partial p}{\partial \theta}$ , and  $\phi$  is the latitude. The brackets denote the zonal mean, one asterisk denotes the deviation from the zonal mean, and two asterisks denote the deviation from the density-weighted zonal average, as in

$$P^{**} = P - \frac{[\rho_\theta P]}{[\rho_\theta]}. \quad (7)$$

230 The formulation of the PV flux in Eq. (6) is also equivalent to that defined using  $v^{**}$ , as in Eq. (4.5) in Tung (1986). The left-hand term in Eq. (6) is the EP flux pseudo-divergence and the right-hand term in Eq. (6) is the zonal-mean northward flux of PV on the isentropic surface. According to Tung (1986), the PV flux corresponds to the pseudo-divergence of the EP flux along isentropic surfaces and acts as the net eddy forcing term of the mean flow. Note that the pseudo-divergence of the EP flux is used here (instead of the divergence) due to the fact that the density on isentropic surfaces changes with time, which is  
 235 the main difference from the conventional EP flux (Edmon et al., 1981).

To better illustrate the physical interpretation of the individual terms in equation Eq. (4) using the concepts of PV flux and EP flux pseudo-divergence, we rewrite Eq. (3) as

$$\frac{\partial P_a}{\partial t} + \frac{1}{\rho_\theta} \nabla \cdot (\rho_\theta P_a \mathbf{V}_c) + \frac{1}{\rho_\theta} \nabla \cdot (\rho_\theta P_c \mathbf{V}_a) + \frac{1}{\rho_\theta} \nabla \cdot (\rho_\theta P_a \mathbf{V}_a) + P \left( \frac{1}{\rho_\theta} \frac{\partial \rho_\theta}{\partial t} \right) = F_a. \quad (8)$$

The second to fourth terms on the left-hand side are the linear and nonlinear terms of the density-weighted PV flux divergence, while the last term is the local density tendency. Since the density-weighted PV is proportional to vorticity, the second to fourth terms can be interpreted as the dynamical contribution to the PV evolution. On the other hand, since the density tendency is inversely proportional to the temperature tendency, the fifth term can be interpreted as the thermodynamic component of the PV evolution. Equation (8) is derived by converting the advection terms in Eq. (3) into density-weighted flux divergence using the continuity equation. Taking the inner product between Eq. (8) and  $E_1$  and neglecting the longitudinal variation of  $E_1$  given  
 245 its wavenumber-0 structure, i.e.,  $E_1 \approx E_1(\phi)$ , we obtain an approximation of the linear and nonlinear terms in equation Eq. (8) (a detailed derivation is provided in Appendix B):

$$L_{low} + L_{high} \approx 2\pi a^2 \int_{\phi_1}^{\phi_2} E_1(\phi) \frac{\partial[\rho_\theta P_a^{**} v_c^*] + [\rho_\theta P_c^{**} v_a^*]}{\partial \phi} \cos \phi d\phi, \quad (9)$$

$$N_{low-low} + N_{low-high} + N_{high-high} \approx 2\pi a^2 \int_{\phi_1}^{\phi_2} E_1(\phi) \frac{\partial[\rho_\theta P_a^{**} v_a^*]}{\partial \phi} \cos \phi d\phi,$$

where  $v$  is the meridional wind,  $a$  is the radius of the Earth, and  $\phi$  is the latitude with  $\phi_1 = 30^\circ\text{N}$  and  $\phi_2 = 90^\circ\text{N}$ . Next, we combine the mode equation budget from Eq. (4) with the zonal-mean PV flux from Eq. (6). Based on the relation shown in

250 Eq. (6) and the fact that  $\nabla \cdot \mathcal{F} \propto \frac{\partial[u]}{\partial t}$  from the zonal momentum equation, one can further obtain the following relation

$$-\frac{\partial[P^{**}v^*]}{\partial\phi} \propto -\frac{\partial}{\partial\phi} \left( \frac{\partial[u]}{\partial t} \right) \propto \frac{\partial\zeta_\theta}{\partial t}. \quad (10)$$

Equation (10) shows that the meridional gradient of zonal-mean PV flux  $\left( -\frac{\partial[P^{**}v^*]}{\partial\phi} \right)$  is connected to the vorticity tendency  $\left( \frac{\partial\zeta_\theta}{\partial t} \right)$ , which is the dynamical component of the rate of change of  $A_1$ .

### 3 Results of mode decomposition: mode equation budget

255 As shown in Figure 1, the first EOF spatial pattern  $E_1$  of the PV daily anomalies in ERA-Interim takes the shape of a wavenumber-0 structure with a negative anomaly at the pole. Thus, a positive <sup>1</sup> (negative) value of  $A_1$  (PC time series of  $E_1$ ) indicates a weakening (strengthening) of the polar vortex. For example, Figure 2a shows the corresponding  $A_1$  for all winter days of ERA-Interim (8490 days in total) and the red vertical lines indicate the onset day of the SSW events. Before SSW events occur,  $A_1$  increases significantly and is strongly positive on the onset day, indicating a weakening and breakdown  
 260 of the polar vortex. Similar EOF spatial patterns are found for the Isca model data (Figure C1), together with a similar increase in  $A_1$  when approaching the SSW central day (Figure 2b). The Isca model data consists of a total of 130 years of simulation, corresponding to 27300 winter days, of which Figure 2b only shows the winter days from the first 40 years as an example. By understanding what contributes to the changes in  $A_1$ , we extract information that helps explain the breakdown of the polar vortex during SSW development. We compute the mode equation budget of  $A_1$  using daily data concatenated for the period  
 265 -50 to -1 days prior to the onset day for all SSW events. There are a total of 25 SSWs in the ERA-Interim reanalysis data, and 78 SSWs in the 130-year simulation in Isca model. Next, we show the composite of SSW events for both reanalysis and the simplified Isca model data.

#### 3.1 Mode equation budget for ERA-Interim

Figure 3 shows the SSW composite of the  $A_1$  mode decomposition budget. The first, second, and third rows show the results  
 270 of the composites of all SSW events, wave-1 SSW events, and wave-2 SSW events, respectively. We apply a 5-days running mean to all lines in Figures 3-6 to remove the high-frequency fluctuations. The bold lines in Figure 3-6 indicate the values that are outside the 2.5th to 97.5th percentile range of normal winter days values, which is computed via a bootstrapping procedure described as follows. In each bootstrap sample, we randomly select with replacement 25 sets of 50 consecutive non-SSW winter days (excluding the 50 days before each SSW) across the different years. We then calculate the mean of these 25 sets of  
 275 non-SSW days to represent the “composite” of normal winter days. We repeat the bootstrap resampling procedure  $B = 1000$

<sup>1</sup>Note that the sign of  $E_1$  is not important. Given the pattern of  $E_1$ , the positive value of  $A_1$  corresponds to the weakening of the polar vortex and indication of a potential SSW event.

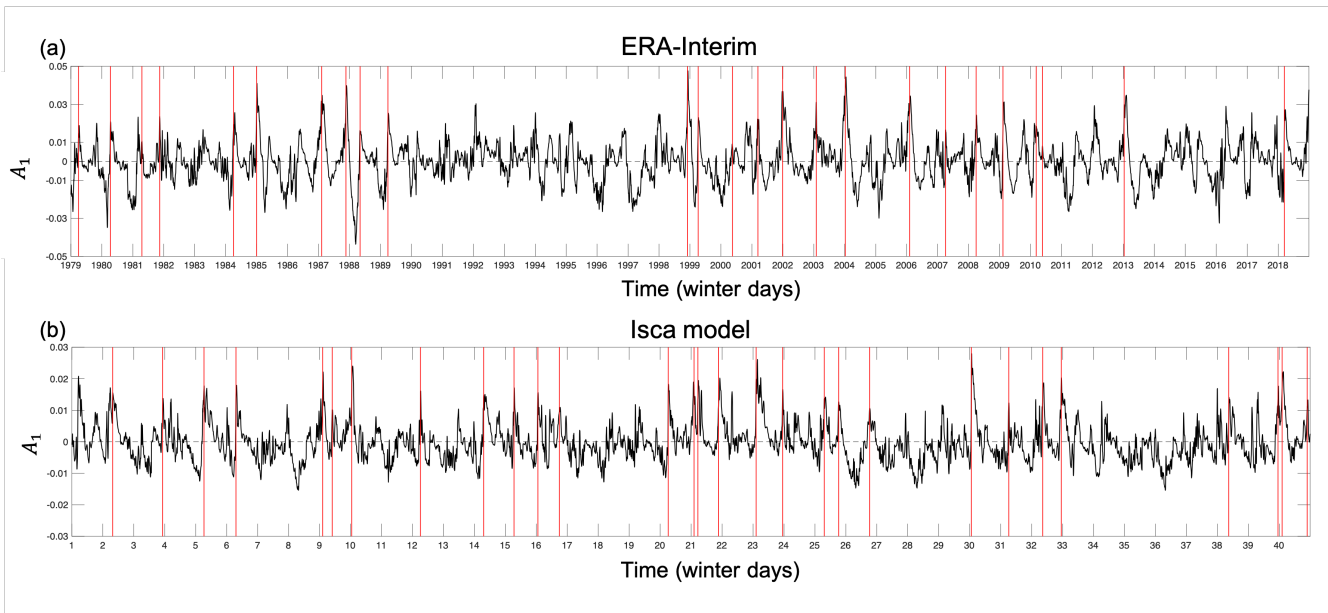

**Figure 2.** The PC time series ( $A_1$ ) of all winter days corresponding to the first EOF mode  $E_1$  using (a) ERA-Interim reanalysis data and (b) Isca model output data. In (a) all winter days (from October to April) are shown and in (b) only the winter days for the first 40 years are shown as an example. The PC time series for winter days of the remaining 90 years in the Isca model data can be seen in Figure C2 in Appendix C. The red vertical lines indicate the onset dates of SSW events.

times and compare the SSW composite against the 2.5th and 97.5th percentile of the  $B$  bootstrap samples. The same procedure is applied also for the two types of SSWs and for the Isca model data, using the number of SSWs in each dataset as the number of sets of consecutive non-SSW winter days in the bootstrapping. **If we only select 50 consecutive non-SSW winter days in December, January, February, and March (months when SSWs occur) to reflect the temporal distribution on**

280 **SSWs, we got a very similar results as using non-SSW days in all winter months. Here we present the results with the bootstrapping using non-SSW days in all winter months.** The reconstructed  $A_1$  tendency (black line in Figure 3) is computed from Eq. (5). The left panels show each term in Eq. (5), while the right panels show the combined effect of all linear (red) and all nonlinear (green) terms without separating the contributions from low and high EOF modes. Figure 3a indicates that around 25 days before the central day of SSWs  $\frac{dA_1}{dt}$  starts to increase, and the increase shows a steeper slope around 10

285 days before the SSW event, leading to a large positive  $A_1$  on the central day as shown in Figure 2a. Along with the increase of  $\frac{dA_1}{dt}$ ,  $L_{low}$  (red) also increases and is well correlated with the  $A_1$  tendency ( $r = 0.8$ ). In fact,  $L_{low}$  starts to increase from 35 days before the events but its effect is offset by other terms and it becomes the only contributor to the increase of  $\frac{dA_1}{dt}$  at 25- to 15-day leads. The nonlinear term  $N_{low-low}$  (green) shows a rapid increase around two weeks before the SSW event and, together with the linear term  $L_{low}$ , significantly contributes to the changes in  $A_1$ . The high-frequency components are overall

290 weaker than the low-frequency terms, especially the  $N_{high-high}$  (cyan), but the  $N_{low-high}$  (orange) has large variations and tends to offset the effect of  $L_{low-low}$  at -25 to -15 days before the vortex weakening.

The contributions from each term are different between the composites of wave-1 vs. wave-2 events (Figures 3c and 3e), respectively. The amplitude of  $L_{high}$  (blue) is large at around one week before the event, and the nonlinear terms are overall small for wave-1 events (Figure 3c) when compared to wave-2 events (Figure 3e). The amplitude of  $N_{low-low}$  is the largest starting one week before the onset for the wave-2 events. To better illustrate the different contributions of linear and nonlinear advection terms in Eq. (5) to the increase of  $\frac{dA_1}{dt}$  in the two types of SSW events, we combine all the linear terms and all the nonlinear terms in Eq. (5) and show the results in the right panels of Figure 3. The linear advection term has the most important contribution from around 25 to 15 days before both SSW event types, and the nonlinear advection term becomes more dominant from day -15 to the onset of the wave-2 SSW events (Figure 3f). On the other hand, the linear advection term plays a central role from day -25 to day 0 for the wave-1 SSWs (Figure 3d). The distinct contributions from the linear and nonlinear advection terms for wave-1 vs. wave-2 events indicate that the processes leading to the vortex breakdown of the two types of SSW events are dynamically different. The simultaneous contributions from linear and nonlinear terms in the all-SSWs composite (Fig. 3a,b) can be viewed as being due to the average over wave-1 and wave-2 SSW events within the composite (Figure 3b). For both types of events, the process captured by the increase of the linear advection term initiates the weakening of the polar vortex around one month before the event and plays a central role until day -10. Around 10 days before the event, the linear (nonlinear) advection term has the dominant contribution for the breakdown of the vortex for the wave-1 (wave-2) events, while the nonlinear (linear) terms are less important or even counteracting the increase of  $\frac{dA_1}{dt}$ . Therefore, the relative importance of the linear and nonlinear terms emerges as a good indicator of the type of SSW events with a lead time of around 10 days prior to the events.

310 The relative importance of the linear and nonlinear advection terms for the two types of SSW events is similar to that of the stratospheric wave amplitude of the wavenumber 1 and 2 components for wave-1 and wave-2 SSW events as shown in Bancalá et al. (2012). From their composite analysis of the wave-2 SSW events, the wave-2 component of the geopotential height anomaly in the stratosphere is significantly positive during day -10 to day 0, and the anomalous increase of wave-1 component was found in the period from day -30 to day -10. In Figure 3 we find that the linear and nonlinear advection terms behave similar to the wave-1 and wave-2 components of the upward propagating wave activity. Consistent with the two periods in Bancalá et al. (2012), the evolution of linear and nonlinear terms can be separated into two different time periods, with one from day -25 to day -15 and the other from day -10 to day 0. Since the displacement (split) SSW events are mainly attributed to the enhanced upward propagation of wave-1 (wave-2) (Nakagawa and Yamazaki, 2006; Bancalá et al., 2012), we also look into the contributions of linear and nonlinear terms to  $\frac{dA_1}{dt}$  for displacement and split SSW events (shown in Figure D1 in Appendix D), with very similar results. Comparing Figures D1a,b with Figures 3c,d, the behavior of each term, i.e., the total linear term and nonlinear advection terms, is very similar as most of the displacement events are wave-1 events (only the event in March 2000 is a wave-2 event). Among the 12 split SSWs, 6 events are dominated by wave-1 wave flux, and most of them do not have a clear split-type behavior as those dominated by wave-2 wave flux. On the other hand, comparing Figures D1c,d to Figures

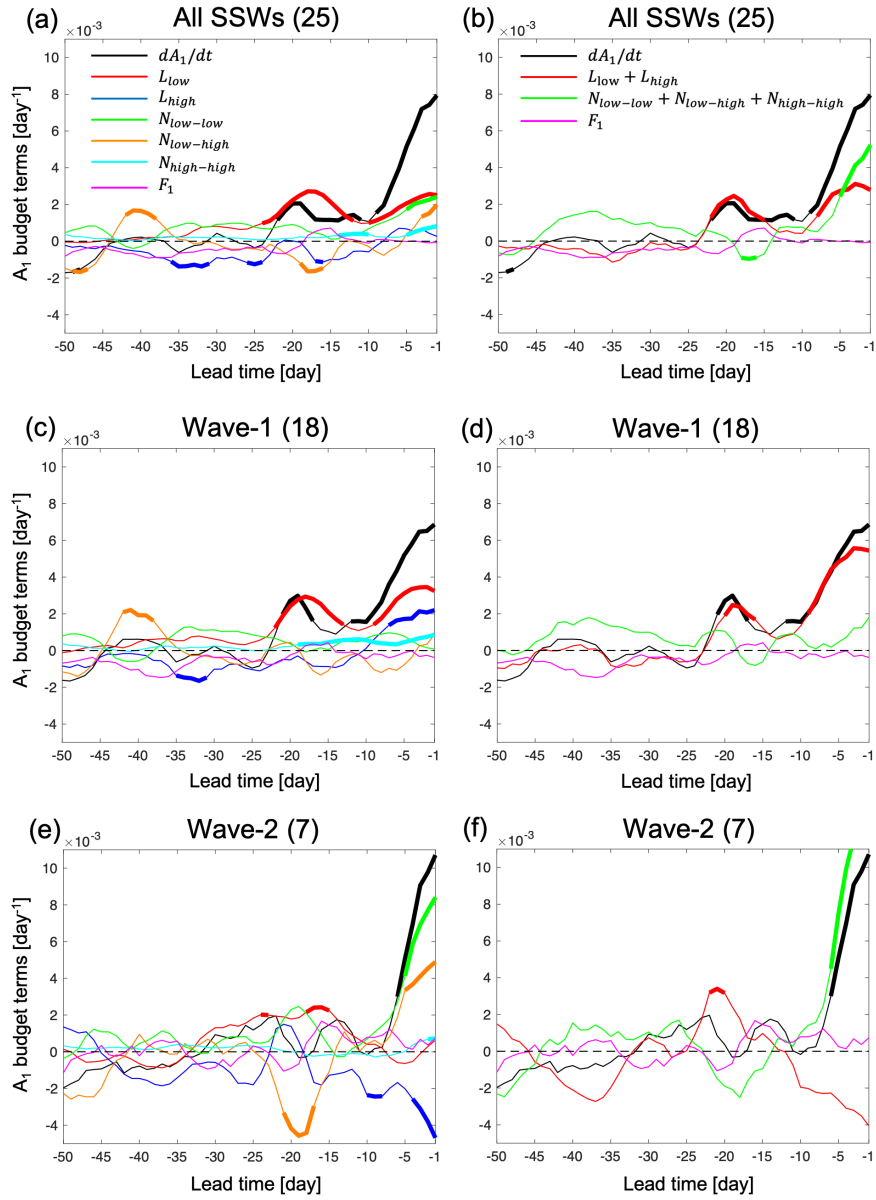

**Figure 3.** The SSWs composite of the  $A_1$  budget as a function of lead time from 50 to 1 days before the onset of events in ERA-Interim. (a, b) Composite of all 25 SSW events, (c, d) composite of the 18 wave-1 events, (e, f) composite of the 7 wave-2 events. (a, c, e) show each term of the mode equation budget (Eq. (5)) separately, and (b, d, f) show the sum of the linear and nonlinear terms for the different subsets of SSWs. The number in the bracket in each panel title indicates the number of SSW events. A 5-day running mean is applied to all lines. Bold lines indicate values that are outside the 2.5th to 97.5th percentile range of normal winter days values from bootstrapping as described in the text. The representation of each line color in (c,e) and (d,f) is the same as the legend in (a) and (b), respectively.

3e,f, the differences between linear and nonlinear terms are more obvious for wave-2 SSWs as only half of the split events are included in wave-2 events. **The behavior of the linear and nonlinear PV advection terms for wave-1 and wave-2 SSWs as shown in Figure 3d and 3f (for displacement and split SSWs in Figure D1) is comparable to the results in Smith and Kushner (2012), who showed that displacement (split) SSW events are preceded by pronounced linear (nonlinear) vertical wave activity. Our results suggest that the linear and nonlinear contributions are more strongly related to the dominant wavenumber wave forcing than to the vortex geometry.**

330 In order to examine the significance in the differences and the robustness of the relative importance of the linear and nonlinear advection terms for the two types of SSW events, we perform bootstrapping on individual wave-1 and wave-2 events with replacement, respectively. We repeat the resampling  $B = 1000$  times and compute the means and the standard deviation for the sum of linear and nonlinear terms. The results of the bootstrapping are shown in Figure 4. There is almost no overlap between the  $\pm 1$  standard deviation of wave-1 (red) and wave-2 (black) events in neither the linear advection (Figure 4a) nor the nonlinear advection (Figure 4b) terms at one week before the onset of the events. In particular, the separation of the wave-1 and wave-2 events in the linear advection term is as early as 10 days before the onset of the events. Figure 4 demonstrates the significance and robustness of the differences in the contribution of the linear and nonlinear advection terms to  $\frac{dA_1}{dt}$  in the wave-1 and wave-2 SSW events, respectively, at least up to one week before the events. Another point to highlight is that significant anomalies of the linear terms are observed around 20 days before both types of SSW events, which is beyond the current predictability limit of SSWs of one-two weeks.

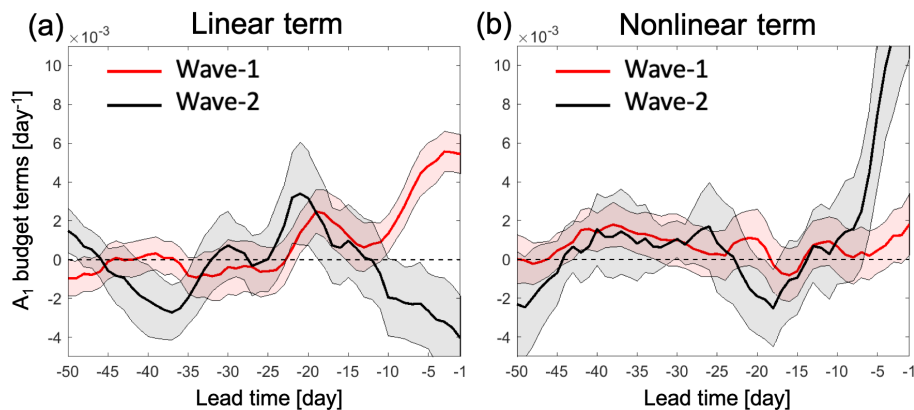

**Figure 4.** The comparison of the  $A_1$  budget of the bootstrapping between wave-1 and wave-2 SSW events as a function of lead time from 50 to 1 days before the onset of events in ERA-Interim. (a) Sum of linear advection terms, and (b) sum of nonlinear advection terms for wave-1 events (red) and wave-2 events (black). A 5-day running mean is applied to all lines. Bold lines and the shading indicate the mean and  $\pm 1$  standard deviation of a bootstrapping using  $B = 1000$  samples.

340

### 3.2 Mode equation budget for the simplified Isca model

Given the limited number of SSW events in the reanalysis data and to further examine the characteristics and robustness of the linear and nonlinear terms contributions to the vortex breakdown, we now apply the same analysis as for ERA-Interim to the output of the simplified Isca model experiment. We use the methodology from Section 2 to extract the EOF modes (spatial patterns) and apply the mode decomposition analysis to the data concatenating 50 to 1 days prior to the 78 SSWs present in the model data. The EOF spatial patterns derived from the model output are similar to those derived from ERA-Interim, especially the first 10 EOF modes (Figure C1), indicating that the model is able to capture the PV features as in the reanalysis.

Figure 5 shows the results of the  $A_1$  budget for the SSW composites. Similar to the results in ERA-Interim (Figure 3), the linear term  $L_{low}$  starts to increase at around day -25, but the increase in  $\frac{dA_1}{dt}$  starts at around day -10 (Figure 5a), which is later than that in ERA-Interim (around day -25). In the period of day -10 to day 0 of SSWs,  $N_{low-high}$  increases rapidly. The increasing  $N_{low-high}$  and  $L_{low}$  lead to a rapid increase of  $\frac{dA_1}{dt}$ . We note that in the 2 days before the onset date, the magnitude of the wave-1 and wave-2 wave fluxes is similar (with differences  $< 5\text{Kms}^{-1}$ ) in some SSW events simulated in the Isca model. In order to make a clearer separation between wave-1 and wave-2 SSWs, we exclude events with the difference in the magnitude of wave-1 and wave-2 heat flux at 100 hPa and  $60^\circ\text{N}$  smaller than  $5\text{Kms}^{-1}$  as these events cannot be clearly categorized as either wave-1 or wave-2 events. Therefore, in the model we have 36 wave-1, 27 wave-2, and 15 unclassified events. Figure 5c shows that  $L_{low}$  for SSWs increases and starts to differentiate from normal winter days starting at a leads of 20 days for wave-1 SSWs. Different from the  $A_1$  budget of wave-1 SSWs in ERA-Interim (Figure 3c),  $N_{low-high}$  starts to increase from day -7 and becomes an important contributor to  $\frac{dA_1}{dt}$ . For wave-2 SSWs, Figure 5e shows that  $N_{low-high}$  is the main contributor to the increase of  $\frac{dA_1}{dt}$  from day -10, and  $N_{low-low}$  as well as  $L_{high}$  are the second largest contributors to  $\frac{dA_1}{dt}$  from day -5, which is different from the evolution of  $L_{high}$  for wave-2 SSWs in ERA-Interim (Figure 3e). In both types of events,  $L_{low}$  starts to increase at around day -20, which helps to weaken the polar vortex in the preconditioning stage and is similar to the evolution of  $L_{low}$  (with a smaller amplitude) in the same period in ERA-Interim. The effects of all linear and all nonlinear terms combined are shown in the right panels in Figure 5. The evolution of the linear and nonlinear advection terms, and thus of  $\frac{dA_1}{dt}$ , for the Isca model (Figure 5b) is similar to the evolution of these terms for the ERA-Interim data (Figure 3b), indicating that the Isca model successfully reproduces the vortex breakdown in the 10 days preceding the SSWs. The increase of  $\frac{dA_1}{dt}$  can therefore be used to predict the occurrence of SSWs with one-two weeks lead time. Even though the distinct increase of  $\frac{dA_1}{dt}$  only shows up at around day -10, the linear advection term actually increases as early as day -29. However, this amplification in the linear term is offset by the nonlinear and forcing terms, which leads to a near-zero  $\frac{dA_1}{dt}$ . Figures 5d and 5f show the evolution of the linear and nonlinear advection terms of the wave-1 and wave-2 SSW composites, respectively. Different from wave-1 events in ERA-Interim, the linear and nonlinear terms are equally important. However, when comparing wave-1 with wave-2 composites, one can still see the difference in the relative importance of the linear and nonlinear terms for the two types of SSWs. The nonlinear term is stronger in wave-2 SSWs than in wave-1 SSWs and is more than twice as large as the linear term one week before the central day (Figure 5f). Thus, our finding from the ERA-Interim that the linear (nonlinear) term is

important for wave-1 (wave-2) events is also true for the Isca model data. The main differences compared with the reanalysis data are that  $\frac{dA_1}{dt}$  exhibits a substantial increase only from day -10, and the variations of all terms in Eq. (5) are overall small before day -10, which could potentially limit the predictability of SSWs in the Isca model. Different reasons might be able to explain the differences in results between the Isca model and the reanalysis, e.g., different model complexities (e.g., lack of parameterizations for gravity waves breaking and interactive ozone chemistry in the Isca model) or the coarse model horizontal resolution (T42), both of which might lead to an underestimation of some of the high-frequency variability in comparison with the reanalysis. Another important difference is that in the Isca model the nonlinear term displays larger values for both types of SSWs compared to the reanalysis. This latter behavior might be related to the stronger SSW-sensitivity to wave-2 forcing in the idealized models (e.g., Isca model) where most of the SSW are likely triggered by wave-2 activity (Gerber and Polvani, 2009), in contrast with wave-1 which seems to be more dominant in more complex general circulation models or reanalysis datasets (see for example Figure 3 in Ayarzagüena et al., 2018). Note that even when classifying an SSW event as a wave-1 event in the model, its wave-2 component, although weaker than the wave-1 component, might still play an important role in the overall evolution of the event.

#### 4 Physical interpretation of the mode decomposition

In our analyses above, we found that the **persistent positive values of  $\frac{dA_1}{dt}$  and its contributors that emerge during the vortex breakdown, such as during SSWs**, are significantly different from the values observed during normal winter days. **Additionally, the signals identified as representative of wave-1 and wave-2 events are also different.** We also observed that the signals that are characteristic of SSWs emerge as early as 20-25 days before the onset of SSWs. Given that these results hint **that SSWs are potentially predictable at longer lead times, i.e., beyond the current predictability limit of one-two weeks**, in this section we provide a physical interpretation of these signals **that we identified through** the mode decomposition analysis.

As introduced in Section 2, the linear and nonlinear advection terms in Eq. (4) and Eq. (5) are closely linked to the PV flux divergence, which offers a more intuitive interpretation in an Eulerian framework. In this section, we use ERA-Interim data to illustrate the physical interpretation of the increase of the linear and nonlinear advection terms in Eq. (5). The motivation to introduce the PV flux into the PV equation is that the zonal-mean PV flux is connected to the pseudo-divergence of the EP flux along isentropic surfaces, and thus acts as the net eddy forcing term of the mean flow, thus allowing for connections with the theory of wave-mean flow interaction (i.e., Eq. (6) and Eq. (10)). According to McIntyre and Palmer (1983), the wave activity of planetary waves is converted to the angular momentum of the mean flow, which violates the non-acceleration condition (Charney and Drazin, 1961), leading to the reversal of the mean flow. To understand the importance of the zonal-mean PV flux during the development of SSWs, we decompose the zonal-mean PV flux into different components as in Ayarzagüena et al.



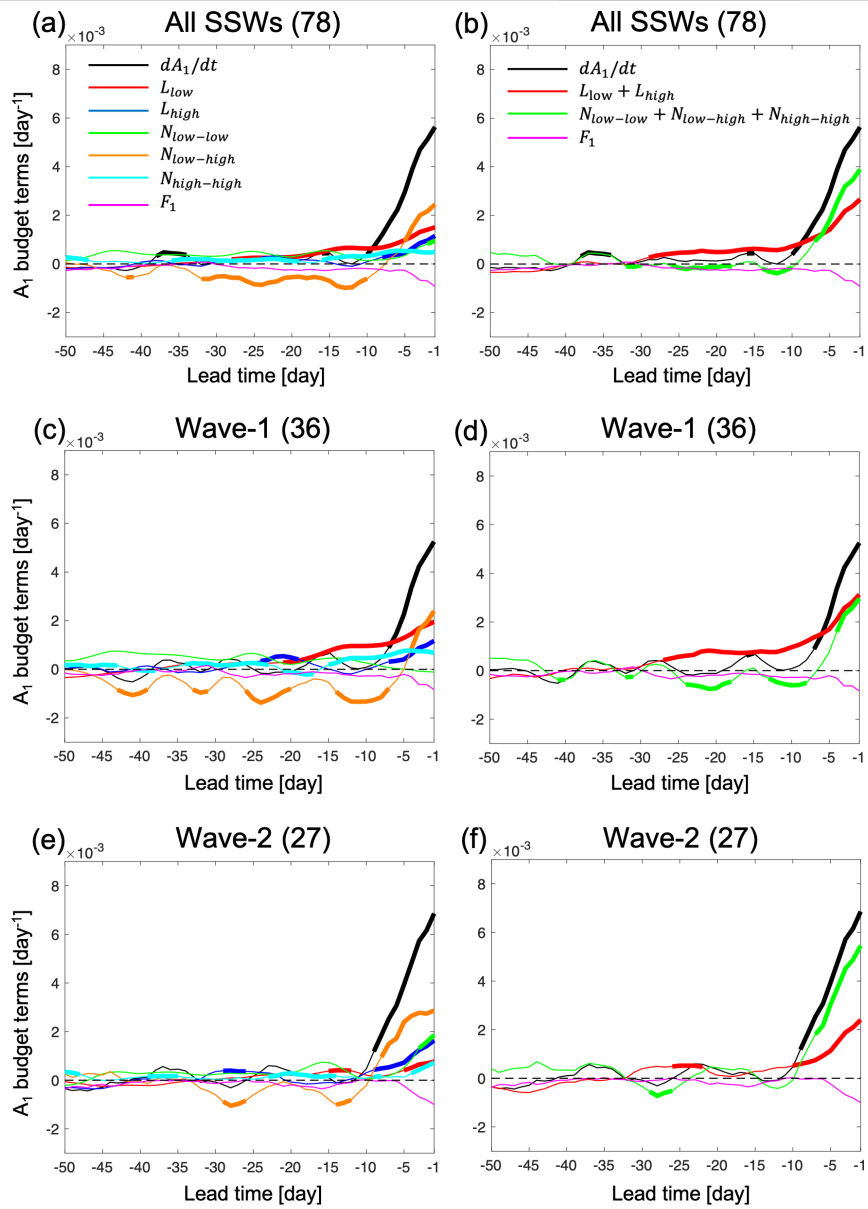

**Figure 5.** The composite of  $A_1$  budget as a function of lead time from 50 to 1 days before the onset of the events in the Isca model output. (a, b) Composite of the total 78 SSW events, (c, d) composite of the 37 wave-1 events, and (e, f) composite of the 26 wave-2 events. (a, c, e) show each term of Eq. (5) separately, and (b, d, f) show the sum of the linear and nonlinear terms for the different subsets of SSWs. All lines are smoothed by a 5-day running mean. Bold lines indicate the values that are outside the 2.5th to 97.5th percentile range of normal winter days values from bootstrapping as described in the text. The representation of each line color in (c,e) and (d,f) is the same as the legend in (a) and (b), respectively.

(2011),

$$405 \quad [\rho_\theta][\rho_\theta P^{**} v^*] \cos \phi = [\rho_\theta] ([\rho_\theta P_c^{**} v_c^*] + [\rho_\theta P_c^{**} v_a^*] + [\rho_\theta P_a^{**} v_c^*] + [\rho_\theta P_a^{**} v_a^*]) \cos \phi, \quad (11)$$

where the subscript  $c$  represents daily climatology, and  $a$  represents daily anomalies. On the right-hand side of Eq. (11), the first term corresponds to the climatological planetary waves, the second and third terms correspond to the interaction between the climatological planetary waves and the daily anomalies, and the fourth (last) term corresponds to the interaction between daily anomalies. Similar to Eq. (3), the second and third right-hand terms can be viewed as linear components, and the fourth  
410 term as the nonlinear component. Figure 6 shows the composite of zonal-mean poleward PV flux averaged north of 45°N and its decomposition in Eq. (11) as a function of lead time ahead of SSW events. **The first term on the right-hand side of Eq. (11) can be seen as a constant since its variation with time is very small as shown in Figure 6.** When approaching the onset day of SSWs, the zonal-mean PV flux (black) becomes increasingly negative, indicating a weakening of the polar vortex. This further decrease of the negative zonal-mean PV flux is mainly due to the linear interaction between the climatological  
415 planetary waves and the daily anomalies (red) and the nonlinear interaction between anomalies (green), which correspond to the linear and nonlinear PV advection terms (right columns in Figure 3), respectively. Even though the climatological planetary waves (blue) also have negative contribution to the total PV flux, the variations are very small with time. Similar to the distinct contributions of the linear and nonlinear PV advection terms in the wave-1 and wave-2 SSW composites, the negative total zonal-mean PV flux is mainly due to its linear component in wave-1 SSWs (red in Figure 6b) and its nonlinear component  
420 in wave-2 SSWs (green in Figure 6c). **The different behavior of the linear and nonlinear PV flux during different types of SSW events is consistent with the behavior of PV advection in Figure 3 and is well aligned with the behavior of the vertical wave flux as shown in Figures 7 and 8 of Smith and Kushner (2012). Different from Smith and Kushner (2012), the nonlinear (linear) component of the PV flux even becomes positive just before the onset of wave-1 (wave-2) events, counteracting the weakening of the polar vortex. The linear zonal-mean PV flux for wave-2 SSWs is positive and**  
425 **statistically significantly different from the normal winter days just before the onset of SSWs, while the linear zonal-mean PV is negative and also statistically significantly different from normal winter days for wave-1 SSWs.** Similar behavior can also be found in the linear advection term for wave-2 SSWs composite (Figure 3f). Even though the amplitude of the negative linear PV flux at around day -15 in wave-2 SSWs composite is small, it helps to weaken the polar vortex and to offset the effect induced by the positive nonlinear PV flux. Note that it is the meridional gradient of the poleward zonal-mean  
430 PV flux that is used to approximate the linear and nonlinear PV advection terms as demonstrated in Eq. (9). The poleward zonal-mean PV flux is proportional to the magnitude of its meridional gradient and one can thus use it to approximate the linear and nonlinear advection terms and to provide a physical interpretation of the signals found in Section 3.

From Figure 6, the linear and nonlinear zonal-mean PV flux emerge as potential indicators for the type of SSW events. Given the abrupt change of the PV flux in the 10 days preceding the onset of the events, we next examine how the spatial patterns of  
435 the poleward PV flux lead to their distinct zonal-mean contributions in the two types of SSWs. Figure 7 shows the poleward linear and nonlinear PV flux horizontal patterns of the wave-1 and wave-2 composites. As shown in the previous analyses, the linear signals start to amplify at around 20-25 days preceding the onset of both types of SSWs, and later the nonlinear

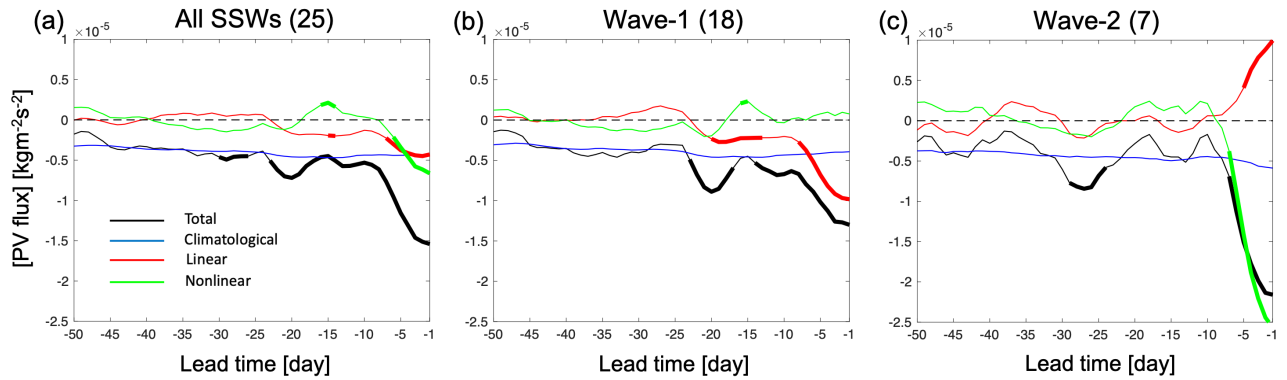

**Figure 6.** Composites of zonal-mean poleward PV flux averaged north of  $45^{\circ}\text{N}$  and its decomposition in Eq. (11) as a function of lead time before SSWs: (a) all SSW events, (b) wave-1 events, and (c) wave-2 events in ERA-Interim. A 5-day running mean is applied to all lines. Bold lines indicate the values that are outside the 2.5th to 97.5th percentile range of normal winter days values from bootstrapping as described in the text. Subfigures (a-c) all share the same color legend as (a).

signals become the most important contributors to the breakdown of the vortex from day -10 onwards for wave-2 events, while the linear signals keep amplifying for wave-1 events. **Based on the different behaviors of linear and nonlinear terms, the deceleration of the polar vortex could be separated into two different periods: the first period from around day -25 to day -15 and the second period from day -10 to day -1.** Thus, two different lead times (day -15 and day -5) are displayed in Figure 7 as example to illustrate the spatial pattern of the PV flux in the two different periods before the onset of the events. The spatial patterns for the linear PV flux of wave-1 events are quasi-stationary from around day -20 (Figures 7a and 7b). A similar wave-2 pattern is also shown in linear PV flux for wave-2 events in the period of 28 to 12 days preceding the onset date (Figure 7c). This pattern disappears from day -11 (not shown), and the wave pattern shown in Figure 7d develops continuously until the central day of the SSW event. At the same time the positive values of PV flux increase, leading to a positive zonal-mean PV flux when close to day 0. Different from the linear PV flux, the nonlinear PV flux shows a clearly higher wavenumber pattern in the second period of the development of wave-2 SSWs shown in Figure 7h, which has a strongly negative PV flux over western North America and a strongly positive PV flux over eastern North America. The downwind growth of the PV flux reaches its extreme magnitude over the North Atlantic and Northern Europe and then the PV flux gradually weakens downstream over North Asia and the North Pacific. This organized wave pattern in the nonlinear PV flux does not emerge until day -11 and remains largely stationary until the onset of the wave-2 events. In the early stage of the warming (day -25 to day -15), the nonlinear PV flux has a very low magnitude as shown in Figure 7g. Since previous studies suggested that split SSWs have a predominantly barotropic structure (Manney et al., 1994; Matthewman et al., 2009; Albers and Birner, 2014), we investigate the vertical structure of the nonlinear PV flux in the wave-2 SSWs composite. Figure 8b shows the longitude-height cross section of the nonlinear PV flux of the wave-2 SSWs composite at day -5 as an example. As can be seen in Figure 8b, the wave pattern shown in Figure 7h extends throughout the stratosphere and displays barotropic characteristics for wave-2

events. On the other hand, the longitude-height cross section of the linear PV flux at day -5 of the wave-1 SSWs in Figure 8a displays a more baroclinic structure in the Eurasia and Pacific regions. The spatial pattern of the nonlinear PV flux in the composite of wave-1 events exhibits substantial transient fluctuations without a clear wave pattern before day -9 (Figure 7e), and shows a more stable and organized spatial pattern in the period from day -9 to day 0 (Figure 7f). However, the magnitude of the nonlinear PV flux in wave-1 events is smaller than its linear flux counterpart and also smaller than the nonlinear PV flux in the wave-2 events composite.

Even though the spatial patterns of the linear PV flux in the two types of SSWs show a wave-2 pattern in the period of 20 to 10 days preceding the central day of SSWs, the locations of the maximum and minimum PV flux shift around  $30^\circ$  in longitude in the Pacific and North America regions (Figures 7a and 7c). In the first period from day -10 to day 0, the wave pattern shown in Figure 7h sets in and leads to the final split of the vortex for wave-2 SSWs. One relevant question is what processes lead to the differences observed in the evolution of the vortex breakdown where the linear PV flux remains important for wave-1 events, while the nonlinear PV flux amplifies for wave-2 events. Some previous studies suggested that the pre-SSW evolution of the polar vortex is distinct between split and displacement events (Charlton and Polvani, 2007; Bancalá et al., 2012), and this preconditioning could trigger the nonlinear resonance of planetary waves in the lower stratosphere, leading to the split of the polar vortex (Albers and Birner, 2014; Boljka and Birner, 2020). Here we examine **the anomalies of PV and meridional wind after removing daily climatology and zonal mean** ( $P_a^{**}$  and  $v_a^*$ , respectively, see Eq. (11)) for the wave-1 and wave-2 events to understand their distinct evolutions after day -10. Figure 9a-b show the spatial pattern of  $P_a^{**}$  (**shading**) and  $v_a^*$  (**green contour**) at day -15 before wave-1 and wave-2 events, respectively. Both  $P_a^{**}$  and  $v_a^*$  present wave-1 patterns, but the positive and negative anomalies are located in different regions. The whole pattern of  $P_a^{**}$  in wave-2 SSWs is around  $60^\circ$  further east compared to wave-1 SSWs. The negative  $v_a^*$  is mainly located over eastern North America and the northern North Atlantic, which is important for the negative PV flux in the same region (Figure 7a) for wave-1 SSWs, while for wave-2 SSWs the negative  $v_a^*$  covers all of North America. These differences in the location of  $P_a^{**}$  (**shading**) and  $v_a^*$  (**green contour**) between the two types of SSW events are amplified from day -10 (Figure 9c-d). The magnitudes of  $P_a^{**}$  and  $v_a^*$  in the first period from day -10 to day 0 are larger than in the second period from day -25 to day -15. The negative  $P_a^{**}$  is located more over North America, while the positive  $P_a^{**}$  is located over the North Atlantic and Europe for wave-1 SSWs (Figure 9c). For wave-2 SSWs, the pattern of  $P_a^{**}$  is the opposite (Figure 9d). The positive  $v_a^*$  extends to the full North Pacific (Figure 9c) and both  $P_a^{**}$  and  $v_a^*$  maintain wave-1 structure for wave-1 SSWs. In contrast,  $v_a^*$  (Figures 9d) develops a wave-2 structure from day -10 onwards for wave-2 events. The weak positive  $P_a^{**}$  over Asia (Figure 9d) further develops from day -5, resulting in a wave-2 structure over mid-latitude at day 0 (not shown). **The main features of nonlinear PV flux in Figure 7 can be roughly inferred by  $P_a^{**}$  and  $v_a^*$  in Figure 9. We note that the composite of the nonlinear PV flux term is not equal to the direct product of the composites of  $P_a^{**}$  and  $v_a^*$ , and thus some features in Figure 7 cannot be directly inferred from Figure 9.** We also find that the nonlinear PV flux and the  $P_a^{**}$  and  $v_a^*$  form a positive feedback from around day -10 to the onset of the wave-2 events. As the amplitude of  $P_a^{**}$  and  $v_a^*$  becomes larger, the nonlinear PV flux is also amplified, particularly in the region of the negative nonlinear PV flux over western North America and the North Atlantic as shown in Figure 7h. The strong negative nonlinear

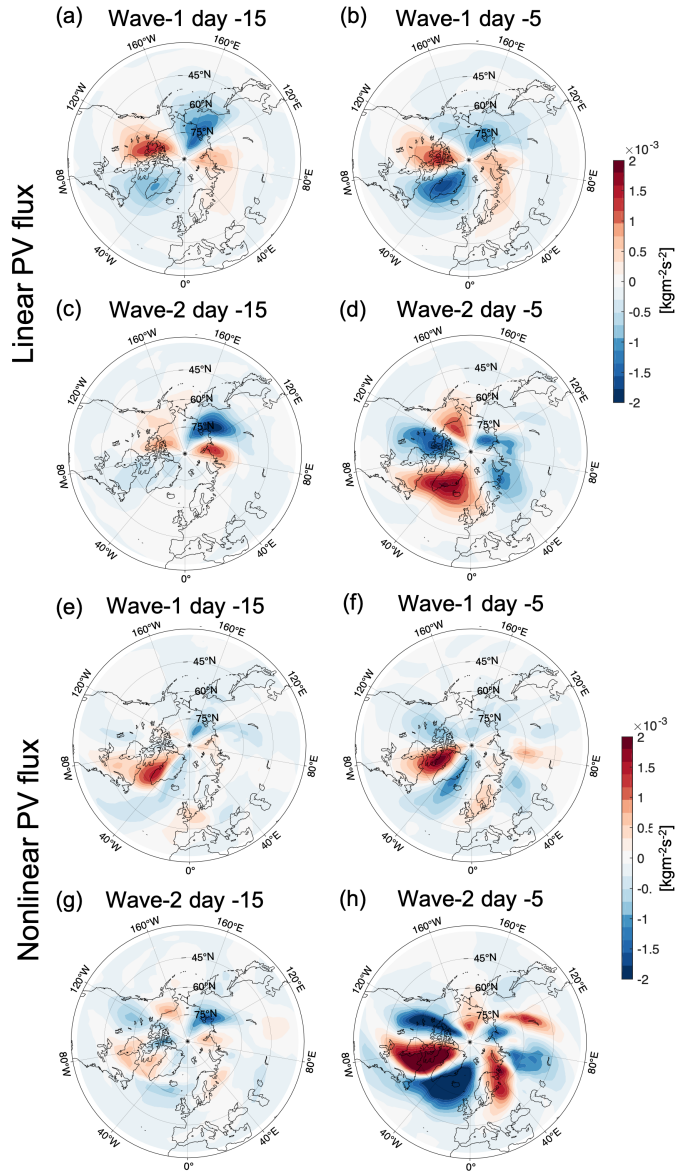

**Figure 7.** The spatial pattern of the linear PV flux for (a, b) the composite of wave-1 SSWs, and (c, d) the composite of wave-2 SSWs. The spatial pattern of the nonlinear PV flux for (e, f) the composite of wave-1 SSWs, and (g, h) the composite of wave-2 SSWs. (a, c, e, g) show the spatial pattern at day -15, and (b, d, f, h) show the spatial pattern at day -5 prior to the events.

PV flux contributes to more negative net zonal-mean PV flux values, suggesting a zonal-mean EP flux convergence. This EP flux convergence thus further decelerates the polar vortex. According to the non-acceleration theorem (Charney and Drazin, 1961), the deceleration of the polar vortex is accompanied by stronger wave activity, which is represented by the increasing amplitude of  $P_a^{**}$  and  $v_a^*$ . We also note that the spatial pattern of  $P_a^{**}$  in Figure 9f finally leads to the split of the polar vortex in wave-2 events, with the positive values corresponding to one of the daughter vortices located around  $60^\circ\text{W}$ .

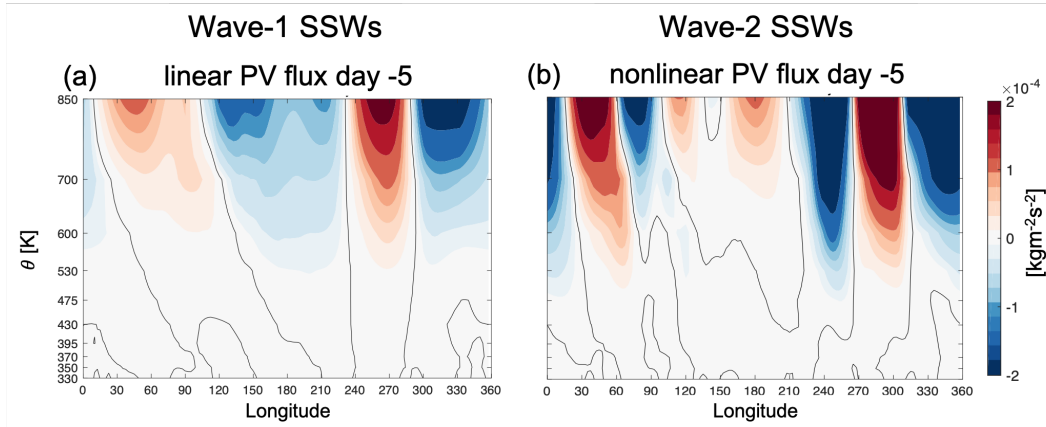

**Figure 8.** The longitude- $\theta$  cross section of PV flux averaged north of  $45^\circ\text{N}$  at day -5. (a) Linear PV flux for wave-1 SSWs and (b) nonlinear PV flux for wave-2 SSWs. Black line indicates the zero value of PV flux.

## 5 Conclusions

In this paper we employ a mode decomposition analysis to investigate the preconditioning of sudden stratospheric warming events. We study the (linear and nonlinear) terms in the potential vorticity equation by means of a budget analysis in order to identify the components in the first PC time series  $A_1$  that allow us to distinguish the behavior of the polar vortex during SSW events from normal winter days. Moreover, we identify characteristics of SSWs that help to identify the type of event (wave-1 vs. wave-2) during the dynamical development of SSWs. The mode decomposition analysis allows us to obtain a mode equation budget that describes the temporal evolution of the stratospheric dynamical processes that lead to the breakdown of the polar vortex. A better understanding of the vortex weakening process may help to improve the predictability of SSW events.

**The rate of change of the first PC time series ( $\frac{dA_1}{dt}$ ) represents the evolution of the strength of the polar vortex, and we find a significant increase in  $\frac{dA_1}{dt}$  at around 25 days before the onset of SSWs. This change in  $\frac{dA_1}{dt}$  marks the start of the vortex weakening process indicating an acceleration of the polar vortex breakdown, and is different from the evolution of  $\frac{dA_1}{dt}$  during normal winter days. The lead time of 25 days that we identified in our analysis is far beyond the current predictability limit of SSW events (Domeisen et al., 2020b), and thus indicates that there may be potential for intrinsic predictability of SSWs at subseasonal time scales.** The increase of  $\frac{dA_1}{dt}$  is mainly due to the increase of the linear PV

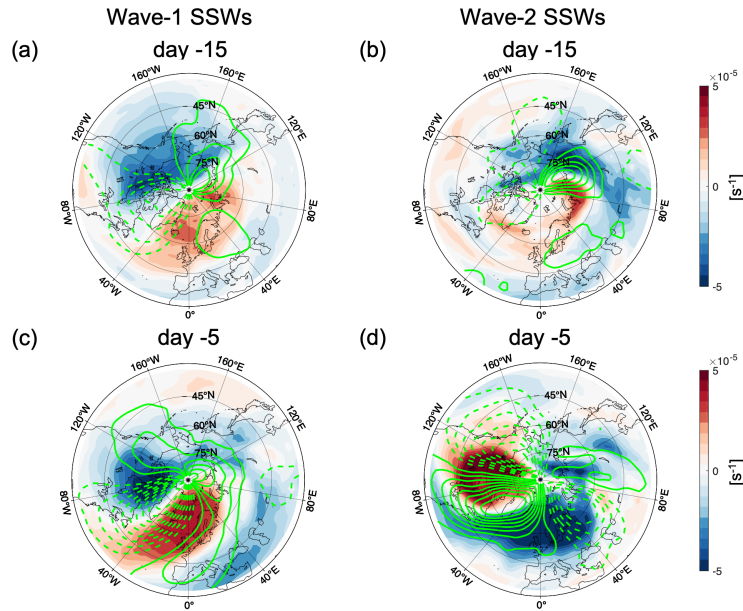

**Figure 9.** The spatial pattern of **anomalies of PV and meridional wind after removing the daily climatology and zonal mean values (a,b) on day -15; (c,d) on day -5.** (a, c) show the composites of wave-1 SSWs, and (b, d) show the composites of wave-2 SSWs. Shading is for the PV anomalies ( $P_a^{**}$ ) and the green contour is for the meridional wind anomalies ( $v_a^*$ ) with dashes for negative values. The contour interval of  $v_a^*$  is 10 m/s.

advection term, which preconditions the weakening of the polar vortex. While recent work suggests that split SSW events are less predictable than displacement events (Taguchi, 2018; Domeisen et al., 2020b), the preconditioning by the increase in the linear PV advection and PV flux is important for both wave-1 and wave-2 SSW events at around 20 days before the onset of the event, implying a similar **intrinsic predictable time scale** with 20 days lead for both types of events. From around 10 days before the events, the nonlinear PV advection term increases rapidly for wave-2 SSWs, but it remains small for wave-1 SSWs. As the nonlinear PV advection term increases, the linear PV advection drops dramatically prior to wave-2 SSWs. The distinct behavior of the linear and nonlinear advection terms in this 10-day period suggests that the type of SSW event could be predicted at around 10 days to one week prior to the events. Note that the type of event is determined by the larger wavenumber component of eddy heat flux in the period of -2 to 0 days before the events and hence the 10-day lead times need to be interpreted with caution. **Note that the different contributions from the linear and nonlinear terms with lead times of at least one week are not directly linked to the definition of the wave-1 and wave-2 events and therefore can be interpreted as signals indicating the type of the events.**

Even though the contributions from linear and nonlinear PV advection terms are different in the two types of SSW events, their overall effects on  $\frac{dA_1}{dt}$  within 10 days before the events are the same, causing  $\frac{dA_1}{dt}$  to increase abruptly. The breakdown

525 of the polar vortex can be divided into two periods based on the different behavior of the linear and nonlinear terms. During  
the first period, i.e., from 25 days to two weeks before the onset of SSWs, the linear term weakens the polar vortex for both  
types of SSWs, and during the second period, i.e., **from around 10 days before the onset date until the onset, the vortex  
evolution for both types of SSWs starts to diverge and the distinct vortex breakdown structures gradually develop.**  
These two different time periods before the onset of the events are consistent with previous studies, especially for wave-2  
530 SSWs (Labitzke, 1981; Bancelá et al., 2012; Albers and Birner, 2014), which suggested that an amplification of the wave-1  
component allows the wave-2 wave flux to grow and propagate more effectively into the already weakening polar vortex region.

In both the ERA-Interim reanalysis and the simplified Isca model experiments, the increase of  $\frac{dA_1}{dt}$  is more abrupt for wave-2  
SSW events than for wave-1 events and thus results in a larger  $\frac{dA_1}{dt}$  in the 10-day period preceding the onset of the events. The  
abrupt changes in  $\frac{dA_1}{dt}$  are mainly due to the exponential increase in the nonlinear PV advection term. By contrast, the linear  
535 PV advection for wave-1 SSWs increases more slowly but consistently. The rapid growth of the nonlinear process for wave-2  
SSWs could be related to a positive feedback between the nonlinear PV flux **and the anomalies of PV and meridional wind**  
when we tried to interpret the underlying dynamics of the mode equation budget. The linear and nonlinear advection terms are  
closely linked to the PV flux divergence, while the zonal-mean PV flux can be directly related to the zonal mean momentum  
budget (McIntyre and Palmer, 1983; Tung, 1986; Plumb, 2010). The zonal-mean poleward PV flux can be further decomposed  
540 into the linear and nonlinear components, whose role in the weakening of the polar vortex is similar to the effect of the PV  
advection terms on the increase of  $\frac{dA_1}{dt}$ . The wave-2 spatial pattern of the linear PV flux helps to precondition the stratospheric  
basic state and decelerate the polar vortex in the first period of the SSW development for both types of SSWs. When the vortex  
weakening process evolves to the second period, the evolution of the PV flux for the two types of SSW events bifurcates as the  
linear and nonlinear PV flux exclusively amplify in the wave-1 and wave-2 events, respectively. This bifurcation could be due  
545 to the specific evolution of the stratospheric states in the two types of events (Charlton and Polvani, 2007; Albers and Birner,  
2014), which can be seen from the horizontal patterns of the PV and meridional wind zonal anomalies. Our results suggest that  
the high wavenumber pattern that emerged in the second period for wave-2 SSWs is closely connected to the wave-2 wave flux  
and could be essential to the split of the vortex.

As suggested by Aikawa et al. (2019), mode decomposition analysis allows us to investigate the contribution of each EOF  
550 mode to the breakdown of the polar vortex, and the way the associated spatial patterns play a role in the temporal evolution of  
the first PC time series. We found that the interactions involving the low modes are the dominant contributors to the weakening  
of the polar vortex, especially for the increase of the linear advection term in the first period (i.e., day -25 to day -15). Further  
investigation of the contribution from each EOF mode to the linear and nonlinear advection terms in the mode equation budget  
suggests that the increase of the linear advection term in the first period is largely influenced by the second and third EOF  
555 modes, which both show a wave-1 structure. The first EOF mode only plays an important role at around one week before the  
SSW event, suggesting that the process for the vortex weakening is initiated by modes that are not zonally symmetric. In terms  
of the nonlinear advection terms, the interactions amongst the first five EOF modes are important when approaching the onset  
of SSWs.



Even though the increase in  $\frac{dA_1}{dt}$  and the contribution from the linear term start at around 25-20 days before the onset of SSWs in ERA-Interim, one needs to be cautious about the interpretation. The signals shown in the composite of SSWs do not necessarily indicate that these signals can be used to predict each individual SSW event with lead times of 20-25 days. While most SSW events do show a consistent positive  $\frac{dA_1}{dt}$  starting 20 days before the SSW onset, around 30% of all SSWs in ERA-Interim do not show this clear increase in  $\frac{dA_1}{dt}$  around lead times of 20-25 days. On the other hand, the linear signals found here with lead times of 3-4 weeks may not be exclusive to SSWs. There are cases where large positive values of the first PC time series do not correspond to an SSW event, but instead to a strong deceleration event. However,  $\frac{dA_1}{dt}$  and the contribution from its linear term for SSW events are overall stronger and more persistent than that for the strong deceleration events (not shown). What we found here suggests that the intrinsic predictability of SSWs may be longer than the current two-week practical predictability. However, more work is still needed to investigate whether the practical predictability of SSWs can actually be extended and if yes, how.

Since the signals shown here indicate that most SSWs could be predictable in subseasonal time scale, it is important to understand which processes could lead to the variability of the first EOF pattern and help improve subseasonal forecast skill. A recent study by Albers and Newman (2021) identified two modes that relate to the linear and nonlinear processes for strong downward propagating stratospheric anomalies, with one mode representing purely stratospheric processes and the other mode representing stratosphere-troposphere coupling. However, they point out that it is not clear which processes are more important for the subseasonal predictability. Even though we have not connected the specific physical processes to the linear and nonlinear signals that are important for the two types of SSWs in this study, the spatial patterns of the PV flux could potentially provide some hints for future investigation. For example, the wave-2 spatial patterns of the linear PV flux are relatively stationary for wave-1 SSW events. This is due to the fact that the orientation of the negative and positive anomalies do not change significantly from day -19 onwards and the orientation of the wave-1 structure also remains stationary in both PV and meridional wind anomalies. These persistent spatial patterns and the linear behaviour in the early stage of development of SSWs may be related to weather phenomena, such as blocking, teleconnections, and low frequency modes in the troposphere. For example, Smith and Kushner (2012) and Cohen and Jones (2011) suggested that the displacement events are preceded by the sea level pressure anomalies associated with the Siberian high which is consistent with the increase of linear vertical wave flux before the events.

In conclusion, our study finds signals that are representative of SSW events as early as 25 days preceding the events. This lead time is significantly longer than the current predictability limit of SSWs. We furthermore find that mode decomposition analysis can help infer wave-1 and wave-2 events at least one week ahead of the event, which is longer than the lead times identified in previous studies (Karpechko, 2018; Taguchi, 2018; Domeisen et al., 2020b). The time scale of emergence of the **distinct evolution between linear and nonlinear terms** provides insights into the different dynamical processes responsible for the two types of SSWs, and thus could be potentially used as a predictor of the type of event in future studies. Given that the noticeable increase in  $\frac{dA_1}{dt}$  in the simplified GCM (Isca model) experiment, which directly indicates the weakening of the polar vortex, shows up only around 10 days before the onset of SSWs (i.e., at shorter lead times than for reanalysis), suggests

that the observed atmosphere tends to be more predictable than the model, which agrees with theory (Smith et al., 2016; Scaife and Smith, 2018). Applying the mode decomposition analysis to more complex forecasting models, i.e., S2S reforecast models (Vitart et al., 2017), to examine the predictability of SSWs will provide further insights into the dynamics of the polar vortex weakening and **might allow one to potentially** predict these events beyond the current lead times. **We are currently investigating these questions in ongoing work.**

*Code and data availability.* The Isca modeling framework was downloaded from the GitHub repository (<https://github.com/ExeClim/Isca>) (Vallis et al., 2018). ERA-Interim reanalysis (Dee et al., 2011) was obtained from the ECMWF server (<https://apps.ecmwf.int/datasets/data/interim-full-daily>).

### Appendix: A. Mode decomposition budget equation

In this appendix, we show the derivation procedure for obtaining the mode decomposition equation budget (Eq. (4)). The spatial patterns associated to the projections ( $\mathbf{U}_1, \mathbf{U}_2, \dots, \mathbf{U}_d$ ) of the wind vector daily anomalies  $\mathbf{V}_a$  onto the PC time series are computed by projecting  $\mathbf{V}_a$  onto the PC time series ( $\{A_1, A_2, \dots, A_d\}$ ). Note that  $\mathbf{U}_1, \mathbf{U}_2, \dots, \mathbf{U}_d$  are not necessarily orthogonal. The anomaly terms of PV and the wind vector fields can be written as

$$P_a = \sum_{n=1}^d E_n A_n, \quad (A1)$$

$$\mathbf{V}_a = \sum_{n=1}^d \mathbf{U}_n A_n.$$

By substituting Eq. (A1) into Eq. (3), we get

$$\sum_{n=1}^d E_n \frac{dA_n}{dt} = -\mathbf{V}_c \cdot \sum_{n=1}^d \nabla E_n A_n - \left( \sum_{n=1}^d \mathbf{U}_n A_n \right) \cdot \nabla P_c - \sum_{n=1}^d \mathbf{U}_n A_n \cdot \sum_{m=1}^d \nabla E_m A_m + F_a. \quad (A2)$$

Taking the inner product between Eq. (A2) and a given EOF mode  $E_k$ , we obtain

$$\sum_{n=1}^d \langle E_k, E_n \rangle \frac{dA_n}{dt} = - \sum_{n=1}^d \langle E_k, \mathbf{V}_c \cdot \nabla E_n \rangle A_n - \sum_{n=1}^d \langle E_k, \mathbf{U}_n \cdot \nabla P_c \rangle A_n - \sum_{m=1}^d \sum_{n=1}^d \langle E_k, \mathbf{U}_m \cdot \nabla E_n \rangle A_m A_n + \langle E_k, F_a \rangle. \quad (A3)$$

Given that  $\{A_1, A_2, \dots, A_d\}$  form an orthogonal basis, i.e.,  $\langle A_k, A_n \rangle = \delta_{kn} C_k$  for a given mode  $k$  (with  $\delta_{kn} = 1$  for  $n = k$ , and  $\delta_{kn} = 0$  for  $n \neq k$ ), with  $C_k$  being the eigenvalue of mode  $k$ , the mode equation budget is computed as

$$\frac{dA_k}{dt} = \frac{1}{C_k} \left( - \sum_{n=1}^d L_{kn}^A A_n - \sum_{n=1}^d L_{kn}^B A_n - \sum_{m=1}^d \sum_{n=1}^d N_{kmn} A_m A_n + F_k \right), \quad (A4)$$

which is the expression of Eq. (4) in Section 2.2.

## 615 Appendix: B. Relation between the rate of change of $A_1$ and the PV flux

In this appendix, we show the derivation for obtaining approximations of the linear and nonlinear terms (Eq. (9)) in the  $A_1$  tendency equation using the PV flux form. Taking the inner product between Eq. (8) and  $E_1$ , and neglecting the variation of  $\frac{1}{\rho_\theta}$  in the inner products, we obtain the following approximation of the rate of change of  $A_1$ :

$$C_1 \frac{dA_1}{dt} \approx -\frac{1}{\rho_\theta} \sum_{n=1}^d \langle E_1, \nabla \cdot (\rho_\theta E_n \mathbf{V}_c) \rangle A_n - \frac{1}{\rho_\theta} \sum_{n=1}^d \langle E_1, \nabla \cdot (\rho_\theta P_c \mathbf{U}_n) \rangle A_n - \frac{1}{\rho_\theta} \sum_{m=1}^d \sum_{n=1}^d \langle E_1, \nabla \cdot (\rho_\theta E_n \mathbf{U}_m) \rangle A_m A_n - \langle E_1, P \frac{1}{\rho_\theta} \frac{\partial \rho_\theta}{\partial t} \rangle + \langle E_1, F_a \rangle, \quad (\text{B1})$$

620 where  $C_1$  is the eigenvalue associated with the first EOF mode of PV. Comparing the linear and nonlinear terms in Eq. (B1) with those in Eq. (A3), we can see that

$$L_{1n}^A + L_{1n}^B \approx \langle E_1, \nabla \cdot (\rho_\theta P_a \mathbf{V}_c) \rangle + \langle E_1, \nabla \cdot (\rho_\theta P_c \mathbf{V}_a) \rangle, \quad (\text{B2})$$

$$N_{1mn} \approx \langle E_1, \nabla \cdot (\rho_\theta P_a \mathbf{V}_a) \rangle.$$

As we mentioned in Section 2.3, given the wavenumber-0 structure of  $E_1$ , we further approximate  $E_1$  to be only a function of latitude. Thus, taking the inner product with  $E_1$  can be approximated as taking a latitude-weighted integral of the meridional gradient of PV flux as demonstrated below:

$$\langle E_1, \nabla \cdot (\rho_\theta P_a \mathbf{V}_c) \rangle + \langle E_1, \nabla \cdot (\rho_\theta P_c \mathbf{V}_a) \rangle \approx 2\pi a^2 \int_{\phi_1}^{\phi_2} E_1(\phi) \frac{\partial [\rho_\theta P_a^{**} v_c^*] + [\rho_\theta P_c^{**} v_a^*]}{\partial y} \cos \phi d\phi, \quad (\text{B3})$$

$$\langle E_1, \nabla \cdot (\rho_\theta P_a \mathbf{V}_a) \rangle \approx 2\pi a^2 \int_{\phi_1}^{\phi_2} E_1(\phi) \frac{\partial [\rho_\theta P_a^{**} v_a^*]}{\partial y} \cos \phi d\phi,$$

where  $a$  is the radius of the Earth, and  $\phi$  is the latitude with  $\phi_1 = 30^\circ\text{N}$  and  $\phi_2 = 90^\circ\text{N}$ . Using Eq. (B3), we can obtain the approximated linear and nonlinear terms from Eq. (9).

## Appendix: C. EOF modes and PC time series of PV in the simplified Isca model

630 In this appendix, we show the spatial patterns of the first 10 EOF modes of PV anomalies at 850 K and the associated first PC time series in the Isca model as described in Section 2.1. The first 10 modes together explain  $\approx 82\%$  of the variance of the PV anomalies of all winter days in Isca model.

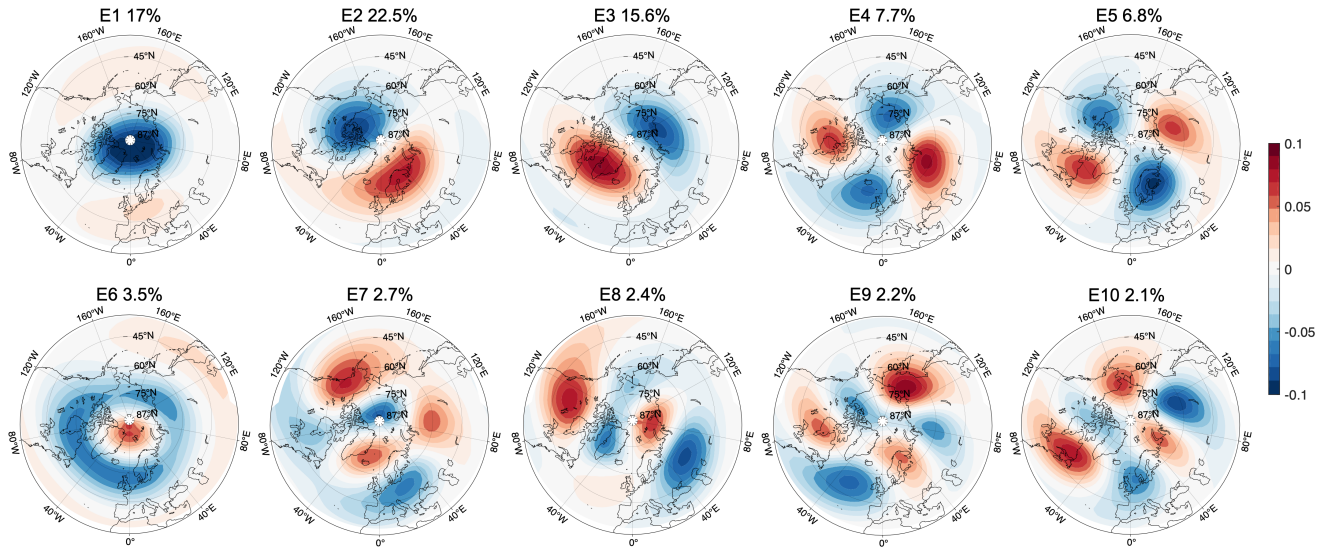

**Figure C1.** The first 10 EOF modes of PV at 850 K ( $E_1, E_2, \dots, E_{10}$ ) of the combined set of basis vectors as described in Section 2.1 using the simplified Isca model daily data. The percentage number indicates the variance explained by each EOF.

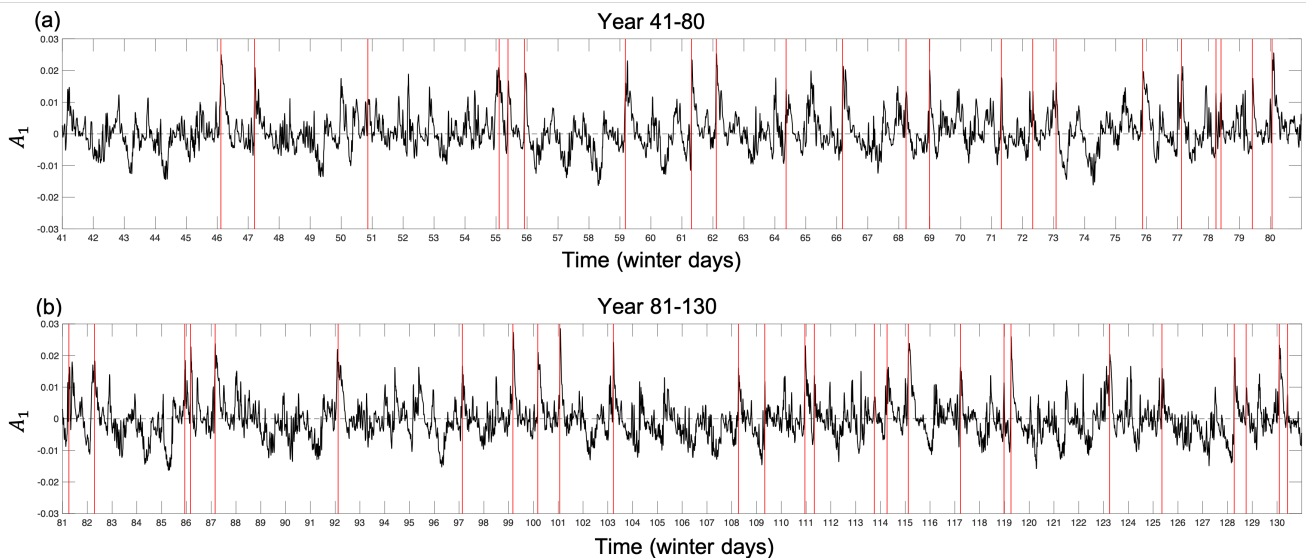

**Figure C2.** The PC time series ( $A_1$ ) of winter days corresponding to the first EOF spatial pattern ( $E_1$ ) using Isca-model winter daily data (from October to April) for (a) Years 41-80 and (b) Years 81-130. The PC time series for the winter days of Years 1-40 can be seen in Figure 2b. The red lines indicate the onset dates of SSW events.

## Appendix: D. Mode decomposition budget for displacement and split SSWs in ERA-interim

In this appendix, we show the  $A_1$  mode decomposition budget for the composites of displacement and split SSW events in ERA-interim, which can be compared with Figure 3.

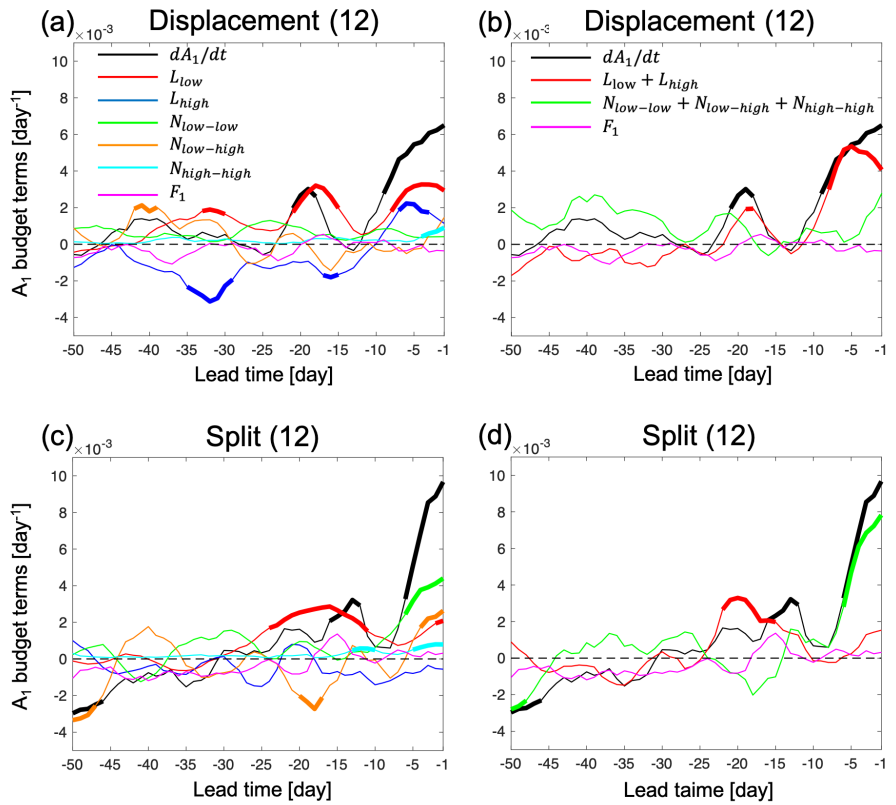

**Figure D1.** The composite of the  $A_1$  budget as a function of lead time from 50 to 1 days before the onset of events in ERA-Interim. (a, b) composite of displacement events, (c, d) composite of split events. (a, c) show each term of the mode equation budget (Eq. (5)) separately, and (b, d) show the sum of the linear and nonlinear terms for the two types of events. The number in the bracket in each panel title indicates the number of SSW events. A 5-day running mean is applied to all lines. Bold lines indicate the values that are outside the 2.5th to 97.5th percentile range of normal winter days values from bootstrapping as described in the text. The representation of each line color in (c) and (d) is the same as the legend in (a) and (b), respectively.

635

*Author contributions.* Z.W. performed the derivations, data analysis, made the figures and wrote the first draft. B.J.-E. performed the Isca model computations. Z.W. and D.D. designed and supervised the study. All authors provided feedback for the manuscript and helped with discussions of the analysis.

*Competing interests.* The authors declare no competing interests.

640 *Acknowledgements.* The work of Z.W. and R.d.F. was funded by the Swiss Data Science Center within the project *EXPECT* (C18-08). Funding from the Swiss National Science Foundation to B.J.-E. and D.D. through project PP00P2\_170523 is gratefully acknowledged.

## References

- Aikawa, T., Inatsu, M., Nakano, N., and Iwano, T.: Mode-decomposed equation diagnosis for atmospheric blocking development, *Journal of the Atmospheric Sciences*, 76, 3151–3167, <https://doi.org/10.1175/JAS-D-18-0362.1>, 2019.
- 645 Albers, J. R. and Birner, T.: Vortex preconditioning due to planetary and gravity waves prior to sudden stratospheric warmings, *Journal of the Atmospheric Sciences*, 71, 4028–4054, <https://doi.org/10.1175/JAS-D-14-0026.1>, 2014.
- Albers, J. R. and Newman, M.: Subseasonal predictability of the North Atlantic Oscillation, *Environmental Research Letters*, 16, 2021, <https://doi.org/10.1088/1748-9326/abe781>, 2021.
- Ayarzagüena, B., Langematz, U., and Serrano, E.: Tropospheric forcing of the stratosphere: A comparative study of the two different major stratospheric warmings in 2009 and 2010, *Journal of Geophysical Research*, 116, D18 114, <https://doi.org/10.1029/2010JD015023>, <http://doi.wiley.com/10.1029/2010JD015023>, 2011.
- 650 Ayarzagüena, B., Polvani, L. M., Langematz, U., Akiyoshi, H., Bekki, S., Office, M., and Centre, H.: No robust evidence of future changes in major stratospheric sudden warmings : a multi-model assessment from CCM1, pp. 11 277–11 287, 2018.
- Ayarzagüena, B., Palmeiro, F. M., Barriopedro, D., Calvo, N., Langematz, U., and Shibata, K.: On the representation of major stratospheric warmings in reanalyses, *Atmospheric Chemistry and Physics*, 19, 9469–9484, <https://doi.org/10.5194/acp-19-9469-2019>, 2019.
- 655 Baldwin, M. P. and Dunkerton, T. J.: Stratospheric harbingers of anomalous weather regimes, *Science*, 294, 581–584, <https://doi.org/10.1126/science.1063315>, 2001.
- Baldwin, M. P., Ayarzagüena, B., Birner, T., Butchart, N., Butler, A. H., Charlton-Perez, A. J., Domeisen, D. I. V., Garfinkel, C. I., Garny, H., Gerber, E. P., Hegglin, M. I., Langematz, U., and Pedatella, N. M.: Sudden Stratospheric Warmings, *Reviews of Geophysics*, 59, 1–37, <https://doi.org/10.1029/2020rg000708>, 2021.
- 660 Bancalá, S., Krüger, K., and Giorgetta, M.: The preconditioning of major sudden stratospheric warmings, *Journal of Geophysical Research Atmospheres*, 117, 1–12, <https://doi.org/10.1029/2011JD016769>, 2012.
- Betts, A. K. and Miller, M. J.: A new convective adjustment scheme. Part II: Single column tests using GATE wave, BOMEX, ATEX and arctic air-mass data sets, *Quarterly Journal of the Royal Meteorological Society*, 112, 693–709, <https://doi.org/https://doi.org/10.1002/qj.49711247308>, <https://rmets.onlinelibrary.wiley.com/doi/abs/10.1002/qj.49711247308>, 1986.
- 665 Birner, T. and Albers, J. R.: Sudden stratospheric warmings and anomalous upward wave activity flux, *Scientific Online Letters on the Atmosphere*, 13, 8–12, <https://doi.org/10.2151/sola.13A-002>, 2017.
- Blume, C., Matthes, K., and Horenko, I.: Supervised learning approaches to classify sudden stratospheric warming events, *Journal of the Atmospheric Sciences*, 69, 1824–1840, <https://doi.org/10.1175/JAS-D-11-0194.1>, 2012.
- 670 Boljka, L. and Birner, T.: Tropopause-level planetary wave source and its role in two-way troposphere–stratosphere coupling, *Weather and Climate Dynamics*, 1, 555–575, <https://doi.org/10.5194/wcd-1-555-2020>, 2020.
- Butler, A. H., Seidel, D. J., Hardiman, S. C., Butchart, N., Birner, T., and Match, A.: Defining sudden stratospheric warmings, *Bulletin of the American Meteorological Society*, 96, 1913–1928, <https://doi.org/10.1175/BAMS-D-13-00173.1>, 2015.
- Charlton, A. J. and Polvani, L. M.: A New Look at Stratospheric Sudden Warmings. Part I: Climatology and Modeling Benchmarks, *Journal of Climate*, 20, 449–469, <https://doi.org/10.1175/JCLI3994.1>, <http://journals.ametsoc.org/doi/abs/10.1175/JCLI3994.1>, 2007.
- 675 Charney, J. G. and Drazin, P.: Propagation of Planetary-Scale Disturbances from the Lower into the Upper Atmosphere, *Journal of Geophysical Research*, 66, 83–109, <https://doi.org/https://doi.org/10.1029/JZ066i001p00083>, 1961.

- Charney, J. G. and Eliassen, A.: A Numerical Method for Predicting the Perturbations of the Middle Latitude Westerlies, *Tellus*, 1, 38–54, <https://doi.org/10.3402/tellusa.v1i2.8500>, 1949.
- 680 Cohen, J. and Jones, J.: Tropospheric precursors and stratospheric warmings, *Journal of Climate*, 24, 6562–6572, <https://doi.org/10.1175/2011JCLI4160.1>, 2011.
- de la Cámara, A., Birner, T., and Albers, J. R.: Are sudden stratospheric warmings preceded by anomalous tropospheric wave activity?, *Journal of Climate*, 32, 7173–7189, <https://doi.org/10.1175/JCLI-D-19-0269.1>, 2019.
- Dee, D. P., Uppala, S. M., Simmons, A. J., Berrisford, P., Poli, P., Kobayashi, S., Andrae, U., Balmaseda, M. A., Balsamo, G., Bauer, 685 P., Bechtold, P., Beljaars, A. C., van de Berg, L., Bidlot, J., Bormann, N., Delsol, C., Dragani, R., Fuentes, M., Geer, A. J., Haimberger, L., Healy, S. B., Hersbach, H., Hólm, E. V., Isaksen, I., Kållberg, P., Köhler, M., Matricardi, M., Menally, A. P., Monge-Sanz, B. M., Morcrette, J. J., Park, B. K., Peubey, C., de Rosnay, P., Tavolato, C., Thépaut, J. N., and Vitart, F.: The ERA-Interim reanalysis: Configuration and performance of the data assimilation system, *Quarterly Journal of the Royal Meteorological Society*, 137, 553–597, <https://doi.org/10.1002/qj.828>, 2011.
- 690 Domeisen, D. I. V.: Estimating the Frequency of Sudden Stratospheric Warming Events From Surface Observations of the North Atlantic Oscillation, *Journal of Geophysical Research: Atmospheres*, 124, 3180–3194, <https://doi.org/10.1029/2018JD030077>, 2019.
- Domeisen, D. I. V. and Plumb, A. R.: Traveling planetary-scale Rossby waves in the winter stratosphere: The role of tropospheric baroclinic instability, *Geophysical Research Letters*, 39, 1–5, <https://doi.org/10.1029/2012GL053684>, 2012.
- Domeisen, D. I. V., Butler, A. H., Charlton-Perez, A. J., Ayarzagüena, B., Baldwin, M. P., Dunn-Sigouin, E., Furtado, J. C., Garfinkel, C. I., 695 Hitchcock, P., Karpechko, A. Y., Kim, H., Knight, J., Lang, A. L., Lim, E. P., Marshall, A., Roff, G., Schwartz, C., Simpson, I. R., Son, S. W., and Taguchi, M.: The Role of the Stratosphere in Subseasonal to Seasonal Prediction: 2. Predictability of the Stratosphere, *Journal of Geophysical Research: Atmospheres*, 125, 1–20, <https://doi.org/10.1029/2019JD030923>, 2020a.
- Domeisen, D. I. V., Butler, A. H., Charlton-Perez, A. J., Ayarzagüena, B., Baldwin, M. P., Dunn-Sigouin, E., Furtado, J. C., Garfinkel, C. I., Hitchcock, P., Karpechko, A. Y., Kim, H., Knight, J., Lang, A. L., Lim, E. P., Marshall, A., Roff, G., Schwartz, C., Simpson, I. R., Son, 700 S. W., and Taguchi, M.: The Role of the Stratosphere in Subseasonal to Seasonal Prediction: 1. Predictability of the Stratosphere, *Journal of Geophysical Research: Atmospheres*, 125, 1–17, <https://doi.org/10.1029/2019JD030920>, 2020b.
- Dommenget, D. and Latif, M.: A cautionary note on the interpretation of EOFs, *Journal of Climate*, 15, 216–225, [https://doi.org/10.1175/1520-0442\(2002\)015<0216:ACNOTI>2.0.CO;2](https://doi.org/10.1175/1520-0442(2002)015<0216:ACNOTI>2.0.CO;2), 2002.
- Edmon, H. J., Hoskins, B. J., and McIntyre, M. E.: Eliassen-Palm Cross Sections for the Troposphere, [https://doi.org/10.1175/1520-0469\(1980\)037<2600:EPCSFT>2.0.CO;2](https://doi.org/10.1175/1520-0469(1980)037<2600:EPCSFT>2.0.CO;2), <http://journals.ametsoc.org/doi/abs/10.1175/1520-0469%281980%29037%3C2600%3AEPCSFT%3E2.0.CO%3B2>, 1981.
- Esler, J. G. and Matthewman, N. J.: Stratospheric sudden warmings as self-tuning resonances. Part II: Vortex displacement events, *Journal of the Atmospheric Sciences*, 68, 2505–2523, <https://doi.org/10.1175/JAS-D-11-08.1>, 2011.
- Gerber, E. P. and Polvani, L. M.: Stratosphere-Troposphere Coupling in a Relatively Simple AGCM: The Importance of Stratospheric 710 Variability, *Journal of Climate*, 22, 1920–1933, 2009.
- Held, I. M., Ting, M., and Wang, H.: Northern winter stationary waves: Theory and modeling, *Journal of Climate*, 15, 2125–2144, [https://doi.org/10.1175/1520-0442\(2002\)015<2125:NWSWTA>2.0.CO;2](https://doi.org/10.1175/1520-0442(2002)015<2125:NWSWTA>2.0.CO;2), 2002.
- Hitchcock, P. and Haynes, P. H.: Stratospheric control of planetary waves, *Geophysical Research Letters*, 43, 884–11, <https://doi.org/10.1002/2016GL071372>, 2016.



- 715 Hoskins, B. J., McIntyre, M. E., and Robertson, A. W.: On the use and significance of isentropic potential vorticity maps, *Quarterly Journal of the Royal Meteorological Society*, 111, 877–946, <https://doi.org/10.1002/qj.49711147002>, <http://doi.wiley.com/10.1002/qj.49711147002>, 1985.
- Jiménez-Esteve, B. and Domeisen, D. I. V.: Nonlinearity in the North Pacific Atmospheric Response to a Linear ENSO Forcing, *Geophysical Research Letters*, 46, 2271–2281, <https://doi.org/10.1029/2018GL081226>, 2019.
- 720 Jucker, M.: Are Sudden Stratospheric Warmings Generic? Insights from an Idealized GCM, *Journal of the Atmospheric Sciences*, 73, 5061–5080, <https://doi.org/10.1175/JAS-D-15-0353.1>, <http://journals.ametsoc.org/doi/10.1175/JAS-D-15-0353.1>, 2016.
- Jucker, M. and Reichler, T.: Dynamical Precursors for Statistical Prediction of Stratospheric Sudden Warming Events, *Geophysical Research Letters*, 45, 124–13, <https://doi.org/10.1029/2018GL080691>, 2018.
- Karpechko, A. Y.: Predictability of sudden stratospheric warmings in the ECMWF extended-range forecast system, *Monthly Weather Review*, 725 146, 1063–1075, <https://doi.org/10.1175/MWR-D-17-0317.1>, 2018.
- Karpechko, A. Y., Hitchcock, P., Peters, D. H. W., and Schneidereit, A.: Predictability of downward propagation of major sudden stratospheric warmings, *Quarterly Journal of the Royal Meteorological Society*, 60, 1459–1470, <https://doi.org/10.1002/qj.3017>, 2017.
- Kidston, J., Scaife, A. A., Hardiman, S. C., Mitchell, D. M., Butchart, N., Baldwin, M. P., and Gray, L. J.: streams , storm tracks and surface weather, *Nature Publishing Group*, 8, 433–440, <https://doi.org/10.1038/ngeo2424>, <http://dx.doi.org/10.1038/ngeo2424>, 2015.
- 730 King, A. D., Butler, A. H., Jucker, M., Earl, N. O., and Rudeva, I.: Observed Relationships Between Sudden Stratospheric Warmings and European Climate Extremes, *Journal of Geophysical Research: Atmospheres*, 124, 13 943–13 961, <https://doi.org/10.1029/2019JD030480>, 2019.
- Kolstad, E. W., Breiteig, T., and Scaife, A. A.: The association between stratospheric weak polar vortex events and cold air outbreaks in the Northern Hemisphere, *Quarterly Journal of the Royal Meteorological Society*, 136, 886–893, <https://doi.org/10.1002/qj.620>, 2010.
- 735 Labitzke, K.: Stratospheric-mesospheric midwinter disturbances: A summary of observed characteristics, *Journal of Geophysical Research*, 86, 9665, <https://doi.org/10.1029/jc086ic10p09665>, 1981.
- Limpasuvan, V., Thompson, D. W., and Hartmann, D. L.: The life cycle of the Northern Hemisphere sudden stratospheric warmings, *Journal of Climate*, 17, 2584–2596, [https://doi.org/10.1175/1520-0442\(2004\)017<2584:TLCOTN>2.0.CO;2](https://doi.org/10.1175/1520-0442(2004)017<2584:TLCOTN>2.0.CO;2), 2004.
- Lindgren, E. A., Sheshadri, A., and Plumb, R. A.: Sudden Stratospheric Warming Formation in an Idealized General Cir-  
740 culation Model Using Three Types of Tropospheric Forcing, *Journal of Geophysical Research: Atmospheres*, 123, 125–10, <https://doi.org/10.1029/2018JD028537>, 2018.
- Manney, G., Farrara, J., and Mechoso, C.: Simulations of the February 1979 Stratospheric Sudden Warming: Model Comparisons and Three-Dimensional Evolution, *Monthly Weather Review*, 122, 1115–1140, 1994.
- Matsuno, T.: A Dynamical Model of the Stratospheric Sudden Warming, *Journal of the Atmospheric Sciences*, 28, 1479–1494,  
745 [https://doi.org/10.1175/1520-0469\(1971\)028<1479:ADMOTS>2.0.CO;2](https://doi.org/10.1175/1520-0469(1971)028<1479:ADMOTS>2.0.CO;2), 1971.
- Matthewman, N. J. and Esler, J. G.: Stratospheric sudden warmings as self-tuning resonances. Part I: Vortex splitting events, *Journal of the Atmospheric Sciences*, 68, 2481–2504, <https://doi.org/10.1175/JAS-D-11-07.1>, 2011.
- Matthewman, N. J., Esler, J. G., Charlton-Perez, A. J., and Polvani, L. M.: A new look at stratospheric sudden warmings. Part III: Polar vortex evolution and vertical structure, *Journal of Climate*, 22, 1566–1585, <https://doi.org/10.1175/2008JCLI2365.1>, 2009.
- 750 McIntyre, E.: How Well do we Understand the Dynamics of Stratospheric Warmings?, *Journal of the Meteorological Society of Japan*, 60, 37–65, [https://doi.org/https://doi.org/10.2151/jmsj1965.60.1\\_37](https://doi.org/https://doi.org/10.2151/jmsj1965.60.1_37), 1982.
- McIntyre, M. E. and Palmer, T.: Breaking planetary waves in the stratosphere, *Nature*, 305, 593–600, 1983.

- Mlawer, E. J., Taubman, S. J., Brown, P. D., Iacono, M. J., and Clough, S. A.: Radiative transfer for inhomogeneous atmospheres: RRTM, a validated correlated-k model for the longwave, *J. Geophys. Res. Atmos.*, 102, 16 663–16 682, <https://doi.org/10.1029/97JD00237>, <http://doi.wiley.com/10.1029/97JD00237>, 1997.
- 755
- Monahan, A. H., Fyfe, J. C., Ambaum, M. H., Stephenson, D. B., and North, G. R.: Empirical orthogonal functions: The medium is the message, *Journal of Climate*, 22, 6501–6514, <https://doi.org/10.1175/2009JCLI3062.1>, 2009.
- Mukougawa, H., Hirooka, T., and Kuroda, Y.: Influence of stratospheric circulation on the predictability of the tropospheric Northern Annular Mode, *Geophysical Research Letters*, 36, L08 814, <https://doi.org/10.1029/2008GL037127>, <http://doi.wiley.com/10.1029/2008GL037127>, 2009.
- 760
- Nakagawa, K. I. and Yamazaki, K.: What kind of stratospheric sudden warming propagates to the troposphere?, *Geophysical Research Letters*, 33, 3–6, <https://doi.org/10.1029/2005GL024784>, 2006.
- Plumb, R. A.: Planetary waves and the extratropical winter stratosphere, in: *The Stratosphere: Dynamics, Transport, and Chemistry*, vol. 190, pp. 23–41, *Geophysical Monograph Series*, <https://doi.org/10.1029/2009GM000888>, <http://doi.wiley.com/10.1029/2009GM000888>, 2010.
- 765
- Polvani, L. M. and Waugh, D. W.: Upward wave activity flux as a precursor to extreme stratospheric events and subsequent anomalous surface weather regimes, *Journal of Climate*, 17, 3548–3554, [https://doi.org/10.1175/1520-0442\(2004\)017<3548:UWAFAA>2.0.CO;2](https://doi.org/10.1175/1520-0442(2004)017<3548:UWAFAA>2.0.CO;2), 2004.
- Scaife, A. A. and Smith, D.: A signal-to-noise paradox in climate science, *npj Climate and Atmospheric Science*, 1, <https://doi.org/10.1038/s41612-018-0038-4>, <http://dx.doi.org/10.1038/s41612-018-0038-4>, 2018.
- 770
- Scaife, A. A., Karpechko, A. Y., Baldwin, M. P., Brookshaw, A., Butler, A. H., Eade, R., Gordon, M., Maclachlan, C., Martin, N., Dunstone, N., and Smith, D.: Seasonal winter forecasts and the stratosphere, *Atmospheric Science Letters*, 17, 51–56, <https://doi.org/10.1002/asl.598>, 2016.
- Scinocca, J. F. and Haynes, P. H.: Dynamical forcing of stratospheric planetary waves by tropospheric baroclinic eddies, *Journal of the Atmospheric Sciences*, 55, 2361–2392, [https://doi.org/10.1175/1520-0469\(1998\)055<2361:DFOSPW>2.0.CO;2](https://doi.org/10.1175/1520-0469(1998)055<2361:DFOSPW>2.0.CO;2), 1998.
- 775
- Sigmond, M., Scinocca, J. F., Kharin, V. V., and Shepherd, T. G.: Enhanced seasonal forecast skill following stratospheric sudden warmings, *Nature Geoscience*, 6, 98–102, <https://doi.org/10.1038/ngeo1698>, <http://dx.doi.org/10.1038/ngeo1698>, 2013.
- Smith, D. M., Scaife, A. A., Eade, R., and Knight, J. R.: Seasonal to decadal prediction of the winter North Atlantic Oscillation: Emerging capability and future prospects, *Quarterly Journal of the Royal Meteorological Society*, 142, 611–617, <https://doi.org/10.1002/qj.2479>, 2016.
- 780
- Smith, K. L. and Kushner, P. J.: Linear interference and the initiation of extratropical stratosphere-troposphere interactions, *Journal of Geophysical Research Atmospheres*, 117, 1–16, <https://doi.org/10.1029/2012JD017587>, 2012.
- Taguchi, M.: Comparison of Subseasonal-to-Seasonal Model Forecasts for Major Stratospheric Sudden Warmings, *Journal of Geophysical Research: Atmospheres*, 123, 231–10, <https://doi.org/10.1029/2018JD028755>, 2018.
- 785
- Tung, K. K.: Nongeostrophic Theory of Zonally Averaged Circulation. Part I: Formulation, *Journal of The Atmospheric Science*, 43, 2600–2618, 1986.
- Vallis, G. K., Colyer, G., Geen, R., Gerber, E., Jucker, M., Maher, P., Paterson, A., Pietschnig, M., Penn, J., and Thomson, S. I.: Isca, v1.0: A framework for the global modelling of the atmospheres of Earth and other planets at varying levels of complexity, *Geoscientific Model Development*, 11, 843–859, <https://doi.org/10.5194/gmd-11-843-2018>, 2018.

790 Vitart, F., Ardilouze, C., Bonet, A., Brookshaw, A., Chen, M., Codorean, C., Déqué, M., Ferranti, L., Fucile, E., Fuentes, M., Hendon, H., Hodgson, J., Kang, H. S., Kumar, A., Lin, H., Liu, G., Liu, X., Malguzzi, P., Mallas, I., Manoussakis, M., Mastrangelo, D., MacLachlan, C., McLean, P., Minami, A., Mladek, R., Nakazawa, T., Najm, S., Nie, Y., Rixen, M., Robertson, A. W., Ruti, P., Sun, C., Takaya, Y., Tolstykh, M., Venuti, F., Waliser, D., Woolnough, S., Wu, T., Won, D.-J., Xiao, H., Zaripov, R., and Zhang, L.: The Subseasonal to Seasonal (S2S) Prediction Project Database, *Bulletin of the American Meteorological Society*, 98, 163–173, 2017.
